1  
2  
3  
4  
5  
6  
7  
8  
9  
10  
11  
12  
13  
14  
15  
16  
17  
18  
19  
20  
21  
22  
23  
24  
25  
26

## **Axon guidance at the midline – a live imaging perspective**

Alexandre Dumoulin<sup>1) 2)</sup>, Nikole R. Zuñiga<sup>1) 2)</sup>, Esther T. Stoeckli<sup>1) 2)\*</sup>

1) Department of Molecular Life Sciences, University of Zurich, Winterthurerstrasse 190, 8057 Zurich, Switzerland

2) Neuroscience Center Zurich, University of Zurich, 8057 Zurich, Switzerland.

**Correspondence:** Esther T. Stoeckli, e-mail: [esther.stoeckli@mls.uzh.ch](mailto:esther.stoeckli@mls.uzh.ch)

**Running title:** Live imaging of axon guidance.

**Key words:** axon guidance, midline, spinal cord culture, live imaging, commissural neurons, neural circuit formation, floor plate.

**For Development, Techniques and Resources, Research Article**

27

28 **Summary statement** (30 words)

29 Live tracking of single growth cones is more informative about axonal behavior during  
30 navigation than inference of behavior from the analyses of snapshots of different growth  
31 cones.

32

33 **ABSTRACT** (180 words)

34 During neural circuit formation, axons navigate several choice points to reach their final  
35 target. At each one of these intermediate targets, growth cones need to switch  
36 responsiveness from attraction to repulsion in order to move on. Molecular mechanisms  
37 that allow for the precise timing of surface expression of a new set of receptors that  
38 support the switch in responsiveness are difficult to study *in vivo*. Mostly, mechanisms  
39 are inferred from the observation of snapshots of many different growth cones analyzed  
40 in different preparations of tissue harvested at distinct time points. However, to really  
41 understand the behavior of growth cones at choice points, a single growth cone should  
42 be followed arriving at and leaving the intermediate target.

43 Here, we describe a spinal cord preparation that allows for live imaging of individual  
44 axons during navigation in their intact environment. The possibility to observe single  
45 growth cones navigating their intermediate target allows for measuring growth speed,  
46 changes in morphology, or aberrant behavior. Moreover, observation of the intermediate  
47 target – the floor plate – revealed its active participation and interaction with  
48 commissural axons during midline crossing.

49

## 50 INTRODUCTION

51 Commissural axons in the developing spinal cord have been used for over two decades  
52 to learn fundamental molecular mechanisms of axon guidance (Stoeckli, 2018). The  
53 focus was on the dl1 subtype of dorsal commissural interneurons, as their axons have a  
54 very stereotypical trajectory at the ventral midline, where they all cross the floor plate  
55 (FP), exit it and turn rostrally along the contralateral border. Thus, dl1 commissural  
56 neurons offer an easy read-out for deciphering molecular mechanisms of axon guidance  
57 at choice points. Since the first application of lipophilic dye tracing in open-book  
58 preparations of rat spinal cords that revealed the normal trajectory of these axons 30  
59 years ago (Bovolenta and Dodd, 1990), this method continues to be used to assess  
60 axon guidance at the midline in mouse and chicken embryos. The comparison between  
61 axons in open-book preparations of control and experimentally manipulated spinal  
62 cords, dissected at specific time points, offered a solid understanding of molecules  
63 involved in axonal midline crossing and subsequent turning in higher vertebrates.  
64 However, the information about mechanisms that can be extracted from such  
65 experiments is limited, as it is deduced from snapshots of axons taken from different  
66 animals. For this reason, we have established a live-imaging approach that allows for  
67 visualization of axonal behavior while they are crossing the midline and then turning  
68 rostrally. We have chosen the chicken embryo, as it is a very accessible model for  
69 studying various developmental processes in intact tissues *in vivo* and *ex vivo* (Sanders  
70 et al., 2013; Das and Storey, 2014; Boubakar et al., 2017; Li et al., 2019). Thanks to a  
71 very stable and reproducible spinal cord culture, we could for the first time characterize  
72 the exact timing of midline crossing and the details of rostral turning by dl1 axons in an  
73 intact environment in control and experimentally manipulated spinal cords. We could get  
74 more insight into growth cone dynamics and morphologies at choice points.  
75 Furthermore, our *ex vivo* method also shed new light on the role of the intermediate  
76 target, the FP cells, their dynamics, morphology and interaction with commissural axons  
77 during midline crossing.

78

## 79 RESULTS

## 80 **Electroporation is an efficient tool to selectively label dl1 neurons**

81 We used unilateral *in ovo* electroporation of the chicken spinal cord in Hamburger and  
82 Hamilton (HH) stage 17-18 embryos to specifically express farnesylated td-Tomato (td-  
83 Tomato-F) in Math1-positive dl1 neurons, as well as farnesylated EGFP (EGFP-F)  
84 expression in their environment (Fig. 1A,B). One day after electroporation, at HH22,  
85 embryos showed expression of td-Tomato-F restricted to dl1 neurons and EGFP-F  
86 expression in the entire half of the spinal cord, as expected (Fig. 1C) (Wilson and  
87 Stoeckli, 2011). At this stage, most of the Math1-positive dl1 axons approached the FP,  
88 but did not yet cross the midline, whereas other more ventral populations of  
89 commissural neurons expressing EGFP-F already projected many axons to the  
90 contralateral side of the spinal cord (white arrowheads and arrow, respectively, Fig. 1C).  
91 For this reason, we chose HH22 as the optimal stage to start tracing dl1 axons at the  
92 midline using live imaging.

93

## 94 **Live imaging of dl1 axons at the midline of intact spinal cord**

95 We extracted the intact spinal cord one day after electroporation (Fig. S1), cultured it  
96 with the ventral midline down and imaged it with an inverted spinning disk microscope  
97 and a 20x objective (Fig. 1D-F). Math1-positive dl1 axons crossing the FP could be  
98 visualized for at least 24 hours (white arrowheads, Fig. 2A; Movies 1, 2). Within this  
99 time window many dl1 axons crossed the midline, exited the FP, turned rostrally and  
100 formed the contralateral ventral funiculus (white arrows, Fig. 2A). A Math1-positive  
101 ipsilateral subpopulation of axons could also be seen in these recordings as previously  
102 reported *in vivo* (Phan et al., 2010) (white asterisk, Fig. 2A). Cultures of intact spinal  
103 cords turned out to be a very stable system as the U-shaped morphology of the  
104 commissure was preserved over time (Fig. 2B, Movie 2) and all major cell populations  
105 were still in place after one day *ex vivo* (Fig. S2). Furthermore, Sonic hedgehog (Shh)  
106 expression was still restricted to the FP and showed the caudal (high) to rostral (low)  
107 gradient like *in vivo* (Fig. S3) (Bourikas et al., 2005), and most importantly, dl1 axons'  
108 navigation was identical to the *in vivo* situation during this time window (Fig. S4). We  
109 also compared our *ex vivo* method with a recently published protocol using open-book

110 preparations of HH24-26 chicken spinal cords (Pignata et al., 2019) (Fig. 1G-I). In  
111 contrast to this protocol, our *ex vivo* method did not result in overshooting axons, an  
112 artefact that was already seen after short times in cultures of open-book preparations,  
113 with Math1-positive dl1 commissural axons that crossed the midline but then failed to  
114 turn into the longitudinal axis and continued to grow straight into the contralateral side  
115 instead (white arrowheads, Fig. 2C,D; Movie 3). Although open-book cultures offer the  
116 possibility to follow midline crossing of dl1 axons, the deformation of the FP and  
117 commissure in this preparation (Fig. 2D) and the fact that diffusible guidance cues are  
118 not well retained in the tissue, most likely lead to these artifacts. These problems were  
119 not seen in our cultures of intact spinal cords with meninges attached that prevents  
120 diffusion of secreted molecules and preserves gradients (Fig. S3). Therefore, our *ex*  
121 *vivo* method of culturing intact spinal cords offers a highly stable intact system in which  
122 dl1 commissural axons are behaving as expected based on what is known from *in vivo*  
123 studies.

124

## 125 **Characterization of the timing of midline crossing by dl1 commissural axons**

126 The time it takes commissural axons to cross the FP has been estimated but could not  
127 be measured exactly (Stoeckli, 2018; Zou, 2012). However, timing is an issue, because  
128 axons have to change their responsiveness to FP-derived guidance cues, like the Slits,  
129 Shh, or Wnt proteins, by expressing appropriate receptors in a precisely regulated  
130 manner (Bourikas et al., 2005; Domanitskaya et al., 2010; Long et al., 2004;  
131 Lyuksyutova et al., 2003; Philipp et al., 2012; Wilson and Stoeckli, 2013). With our  
132 method, we could track single dl1 commissural axons in the FP at any time point and in  
133 different regions of interest (black arrowheads, Fig. 2E). We were therefore able to ask,  
134 how long dl1 axons needed for FP crossing and their subsequent rostral turn (Fig. 3A).  
135 On average, dl1 commissural axons took  $5.6 \pm 1.4$ h to cross the entire FP and  $1.4 \pm 1.0$ h  
136 to turn and initiate the rostral growth at the FP exit site. Thus, in total, they needed  
137  $6.9 \pm 1.8$ h from entering the FP to the initiation of their rostral growth (mean  $\pm$  standard  
138 deviation, Fig. 3B and Table S1). There was no significant difference between the  
139 average time of crossing the first versus the second half of the FP (Fig. 3B, Table S1).

140 This was supported by kymographic analysis of a region of interest within the FP from  
141 24-hour time-lapse recordings showing similar growth patterns between the first and  
142 second half of the FP at the single axon level (Fig. 3C, black arrowheads in Fig. 3D,  
143 Movie 4). Although the kymographic analysis was useful to screen for overall growth  
144 pattern of single dl1 axons within the FP (Fig. 3E,F), it was not sensitive enough to  
145 detect more subtle changes in growth speed. Hence, we used a virtual tracing tool to  
146 follow the movement of the leading edge of each growth cone at each time point (Fig.  
147 3G). With this tool we could extract the instantaneous growth speed for each axon. It  
148 turned out that the large majority of them had a fluctuating growth pattern with random  
149 acceleration-deceleration pulses that could be observed in early as well as late crossing  
150 axons (Fig. 3H, Movie 5, Fig. S5). Another interesting observation was made when we  
151 compared the times of crossing the FP and the initiation of rostral growth after turning. It  
152 seemed that there was a trend towards reduced time of FP crossing in later crossing  
153 axons, but this was not significant ( $p=0.0503$ ; Fig.3I). However, the time dl1 axons took  
154 to turn rostrally at the exit site was significantly reduced over time (Fig. 3J). The latter  
155 observation suggest that commissural axons that already turned anteriorly at the  
156 contralateral FP exit site might help the following ones to turn more rapidly. Our method  
157 offers new opportunities for further investigations of possible collaborations between  
158 axons at choice points.

159

## 160 **Characterization of the dl1 growth cone morphology at choice points**

161 Another aspect that we considered was growth cone morphology. The growth cone  
162 plays a central role in axon guidance, as it explores the environment for guidance cues  
163 and translates this information into the directionality of growth (Stoeckli, 2018; de  
164 Ramon Francàs et al., 2017). We observed that dl1 growth cones in the FP appeared to  
165 have a thin and elongated shape in the direction of growth. At the FP exit site, they  
166 transiently enlarged (arrowheads, Fig. 4D, Movie 2). We measured the average growth  
167 cone area in each segment of interest and confirmed that growth cones at the exit site  
168 of the FP were indeed significantly larger than the ones within the FP or after the turn  
169 (Fig. 4A,B, Table S1). There was no significant change in the average growth cone area

170 between the first and second half of the FP (Fig. 4B, Table S1). The changes of growth  
171 cone shape were in line with previous reports on chicken and rat commissural axons *in*  
172 *vivo* (Bovolenta and Dodd, 1990; Yaginuma et al., 1991) and our data on Math1-positive  
173 axons *in vivo* (Fig. 4C, Table S1, Fig. S4B). The possibility to follow individual axons  
174 over time allowed us to make novel observations of their behavior at the FP exit site.  
175 The growth cones very often extended long filopodia in both rostral and caudal direction  
176 just before turning (Fig. 4D, Movies 6, 7). Some of the growth cones even appeared to  
177 transiently split just before turning rostrally, similar to dorsal root ganglia central  
178 afferents in the mouse dorsal root entry zone before bifurcating (Dumoulin et al., 2018)  
179 (Movie 8). All these features are present *in vivo*, as similar growth cone morphologies  
180 were found in fixed HH24-25 spinal cords (Fig. 4E). Thus, *ex vivo* live imaging of  
181 cultured intact spinal cords using low magnification time-lapse microscopy offers the  
182 opportunity to detect morphological changes of growth cones at choice points and is  
183 ideal for the analysis of many aspects of midline crossing. However, the limited  
184 resolution especially in 3D might preclude the detection of more subtle changes in  
185 morphology of growth cones while crossing the midline.

186

### 187 **Higher magnification analysis of commissural axons crossing the midline** 188 **revealed dorso-ventral activities of their growth cone**

189 For this reason, we repeated time-lapse recordings of cultured intact spinal cords using  
190 a higher magnification objective and advanced 3D deconvolution technology. This  
191 allowed following Math1::tdTomato-F-positive dl1 axons over time while entering,  
192 crossing and exiting the FP (Movie 9). We observed that dl1 growth cones crossing the  
193 FP were bulkier in the dorso-ventral axis (white arrowheads, Fig. 5A, Movie 10) and  
194 were particularly dynamic in this axis showing rapid extension of filopodial protrusions  
195 (white arrows in Fig. 5A and Movie 10). This aspect of dl1 growth cone behavior in the  
196 FP was supported by immunostaining of HH22-24.5 whole-mount spinal cords or  
197 cryosections (arrowheads, Fig. 5B-D, Movie 11,12). In line with their dorso-ventral  
198 activity we could observe that dl1 growth cones in the commissure sent a dynamic long  
199 protrusion (up to ~13  $\mu\text{m}$ ) into the FP while crossing it (black arrow, Fig. 5E, black

200 arrowheads, Movie 13). Protrusions entering the FP could also be detected for dl1  
201 growth cones *in vivo* as revealed by immunostaining of HH22-24.5 whole-mount spinal  
202 cords or cryosections (white arrows, Fig. 5F,G). Next, we also had a closer look at the  
203 FP exit site, where growth cones need to read longitudinal gradients to initiate the  
204 rostral turn after exiting the FP (Pignata et al., 2019; Stoeckli, 2018). Intriguingly, we  
205 detected that just before exiting the FP, dl1 growth cones very often sent a long  
206 protrusion into the FP (arrow, Fig. 5H, Movie 14). Live imaging clearly revealed that the  
207 activity and orientation of growth cones switched by about 90° after exiting the FP, as  
208 they flattened in the dorso-ventral axis and enlarged in the longitudinal axis *ex vivo* and  
209 *in vivo* (Fig. 5I,J, Movie 15). Another unexpected observation we made was that some  
210 dl1 growth cones transiently split while crossing the FP (asterisks in Movie 13). The  
211 splitting created two more or less equal branches (black arrows, Fig. 5K, Movie 16), but  
212 only one persisted and grew straight to the contralateral side, while the other one was  
213 retracted (black asterisks, Fig. 5K, Movie 16). Also this behavior was supported by  
214 snapshots from *in vivo* behavior of dl1 growth cones (arrows, Fig. 5L). Taken together,  
215 *ex vivo* live imaging combined with high magnification analysis of growth cone dynamics  
216 allowed us to characterize the behavior dl1 growth cones at choice points in more  
217 detail.

218

### 219 **Live imaging unraveled the dynamics and morphologies of floor-plate cells** 220 **during midline crossing**

221 The orientation of dl1 growth cones as well as their behavior during FP crossing  
222 suggested that they have to squeeze their way between the basal feet of FP cells which  
223 are attached to the basal lamina (Yaginuma et al., 1991; Yoshioka and Tanaka, 1989).  
224 Moreover, very little was known about the morphology of FP cells during axonal midline  
225 crossing and their potential active contribution in this process has never been  
226 addressed (Campbell and Peterson, 1993; Yaginuma et al., 1991; Yoshioka and  
227 Tanaka, 1989). Therefore, we examined the behavior and morphology of FP cells  
228 during midline crossing in our *ex vivo* system. We electroporated spinal cords at HH17-  
229 18 after injection of a plasmid encoding EGFP-F under the FP-specific Hoxa1 enhancer



230 for expression of the membrane-bound fluorescent protein in FP cells (Li and Lufkin,  
231 2000; Wilson and Stoeckli, 2011; Zisman et al., 2007) (Fig. 6A-D). With this we were  
232 able to see *Hoxa1::EGFP-F*-positive bulky FP basal feet in the commissure *in vivo*  
233 (white arrowheads, Fig. 6C) as well as their thin morphology and orientation (white  
234 arrows) that seemed to be tightly aligned with dl1 growth cones crossing the midline  
235 (white arrowheads, Fig. 6E). The morphology of medial FP basal feet with little  
236 extension in the rostro-caudal axis but enlarged in the dorso-ventral axis could be  
237 observed in real time using our *ex vivo* culture technique (Fig. 6F, Movie 17).  
238 Interestingly, we could observe dynamic protrusions sprouting from the basal feet in  
239 direction of axonal growth in the commissure (black arrows, Fig. 6F, Movie 17). Similar  
240 observations were made for basal feet of lateral FP cells (black arrow, Fig. 6G). They  
241 showed a very high activity with very dynamic protrusions towards the FP entry zone  
242 (black arrows, Fig. 6G, Movie 18). Importantly, we could observe a similar morphology  
243 of medial FP basal feet at the single-cell level *in vivo* (arrowheads, Fig. 6H, Movie 19).  
244 The dl1 commissural axons had the same orientation as the FP basal feet and seemed  
245 to grow in between these feet and interact with them *in vivo* (Movie 19 and 20).  
246 Moreover, we could observe similar protrusions coming either from lateral FP basal feet  
247 (white arrows) going towards pre-crossing dl1 axons arriving at the FP (white  
248 arrowheads, Fig. 6I), or from medial FP basal feet extending parallel to axons in the  
249 commissure (white arrows, Fig. 6J and Movie 21). The tight interaction between dl1  
250 axons and FP basal feet during midline crossing was unexpected (Movie 21). The  
251 observation that protrusions from lateral FP basal feet (white arrowhead) were  
252 extending and contacting dl1 growth cones before they entered the FP (white arrows)  
253 suggested a much more active role of FP cells than anticipated (Fig. 6K, Movie 22).  
254 Last but not least, we could confirm that FP basal feet structures (yellow arrow) were  
255 present in between transiently splitting dl1 growth cones (white arrowheads and arrows)  
256 in the commissure (Fig. 6L, Movie 23). Taken together, these data showed for the very  
257 first time the detailed morphology of single FP cells, their dynamics and tight  
258 interactions with axons during midline crossing, and they emphasized the probable  
259 active role of FP cells in initiating contacts with growth cones before and during midline  
260 crossing.

261

262 **Trajectory and behavior of dl1 axons can be visualized in real time at choice**  
263 **points**

264 Our *ex vivo* culture method not only offers great opportunities to characterize behavior  
265 of growth cones and FP cells in a preserved system, but it also opens new possibilities  
266 for tracking axonal behavior after specific perturbations of either the neurons or their  
267 environment. As example, the Wnt receptor Fzd3 (Frizzled-3) was specifically  
268 downregulated in Math1-positive dl1 neurons (Alther et al., 2016; Wilson and Stoeckli,  
269 2011) (Fig. 7A). Fzd3 is required for the rostral turn of post-crossing commissural axons  
270 at the contralateral FP border *in vivo* (Alther et al., 2016; Lyuksyutova et al., 2003). We  
271 used our *ex vivo* culture system to visualize Math1::EGFP-F-positive dl1 axons  
272 expressing a microRNA for Fzd3 (miFzd3, Fig. 7B,C). This allowed us to follow in real  
273 time how dl1 growth cones were turning caudally instead of rostrally at the contralateral  
274 FP border (black arrowheads, Fig. 7B; Movie 24 and 25). Interestingly, many axons  
275 were found to turn erroneously in caudal direction at the same position, suggesting that  
276 axons were influenced by close contact with other axons (black asterisk and black  
277 arrows in Movie 24). In addition, some axons were found stalling at the FP exit site  
278 without initiating any turn (black arrowhead, Fig. 7C, Movie 25). Nonetheless, the  
279 growth cones remained highly dynamic. The changes in morphology were accompanied  
280 with transient retraction and re-extension but without a clear change in directionality.  
281 Importantly, expressing a control microRNA (mi2Luc) did not impact the guidance of dl1  
282 axons at the contralateral FP border (Fig. 7D, Movie 26). Taken together, our method  
283 can be used to study the behavior of axons after perturbation of candidate genes  
284 specifically in the neurons or their target in real time.

285

286 **DISCUSSION**

287 The possibility to follow one axon over time, rather than deducing behavior from  
288 snapshots of different axons, allowed us to extract detailed information on the timing of  
289 midline crossing and the tight interaction between FP cells and the growth cones in a

290 higher vertebrate model (Figure 8). Our *ex vivo* system offers significant improvement  
291 over existing open-book culture systems which lead to obvious guidance artefacts at the  
292 contralateral FP border (Figure 2) (Pignata et al., 2019). Our *ex vivo* culture system is  
293 highly reproducible and generates a manageable amount of data compared to live  
294 imaging using light sheet-based microscopy, for example (Liu et al., 2018).

295 Our comparative analyses demonstrate that midline crossing of dl1 axons in our *ex vivo*  
296 system was very similar to what happens *in vivo* (Figure 2,4,5 and S4). Therefore, our  
297 *ex vivo* system can be used to monitor and assess axonal behavior at choice points. We  
298 could detect that dl1 growth cones took on average 5.6 hours to cross the entire FP and  
299 that they did so in a pulsed manner (black arrowheads, Figure 8). We could also  
300 measure that they needed on average 1.4 hours to initiate their rostral growth, and that  
301 the first axons exiting the FP took longer than the followers (Figure 8A). In total they  
302 needed almost 7 hours from entering the FP to making the decision to turn rostrally  
303 (blue arrowhead, Figure 8A). This is enough time for growth cones to change their  
304 responsiveness to specific guidance cues for crossing and exiting the FP as well as for  
305 turning rostrally due to changes in receptor expression regulated at the post-  
306 translational, translational and even transcriptional level (Nawabi et al., 2010; Philipp et  
307 al., 2012; Pignata et al., 2019; Preitner et al., 2016; Stoeckli, 2018; Wilson and Stoeckli,  
308 2013).

309 The growth cone is the decision center where axon guidance instructions are  
310 transduced to the cytoskeleton (Vitriol and Zheng, 2012). With our newly developed *ex*  
311 *vivo* system, dynamic changes in dl1 commissural growth cone morphology and  
312 behavior at the midline can be observed in real time. Growth cones were thin and  
313 elongated in the FP with their major extension in the dorso-ventral axis (black  
314 arrowheads, Figure 8A,C). At the FP exit site, they showed a 90° rotation to be enlarged  
315 and active in the longitudinal axis (green arrowhead and black arrow, Figure 8A, black  
316 arrowhead, Figure 8D). The fact that dl1 growth cones sent a long filopodium into the  
317 FP, towards the FP cell soma area, while crossing it and just before exiting it, suggests  
318 that they might need to read signals from this area in order to move on and exit the FP  
319 (orange arrows in Figure 8C and D). The extension of long filopodia just before FP exit

320 and rostral turning suggests that actin polymerization might be required to sense  
321 repulsive cues – for instance SlitN and Shh, respectively – and transduce the signal into  
322 the growth cone, as suggested for Slit-induced growth cone collapse *in vitro* (McConnell  
323 et al., 2016). Further investigations using our *ex vivo* culture system will be required to  
324 understand the role of cytoskeletal dynamics in axonal navigation of the intermediate  
325 target.

326 Our method also suggested a probable active contribution of FP cells to axon guidance,  
327 as we found the cells of the intermediate target to be very dynamic and to extend  
328 protrusions in directions of the arriving axons, or to actively engage with axons in the  
329 FP. Thus, it seems that the intermediate target is much more than a passive by-stander  
330 and provider of attractive and repulsive axon guidance and cell adhesion molecules. We  
331 characterized the FP cell morphologies in detail in the medial as well as the lateral FP.  
332 Basal feet appeared to be enlarged and oriented parallel to commissural growth cones  
333 (Figure 8C). The lateral FP basal feet sent protrusions (black arrows) towards dl1  
334 growth cones approaching the FP and eventually interacted with them (black  
335 arrowhead, Figure 8B). This intriguing observation led us to speculate whether these  
336 protrusions might be cytonemes. Cytonemes are long protrusions known to spread and  
337 deliver morphogens, such as Wnts and Shh, to neighboring or more distant cells  
338 (González-Méndez et al., 2019; Sanders et al., 2013; Stanganello and Scholpp, 2016).  
339 Given the fact that Shh is involved in guiding pre-crossing commissural axons towards  
340 the FP and that Shh and Wnts are both involved in guiding post-crossing axons towards  
341 the brain at the contralateral FP border, it is tempting to speculate that these protrusions  
342 might deliver such signals to the growth cones at choice points (Avilés et al., 2013).  
343 Moreover, we could appreciate how much the axons and their growth cones were  
344 intermingled within the medial FP basal feet which also formed long dynamic  
345 protrusions within the commissure (black arrowheads, Figure 8C). In sum, the  
346 combination of our live imaging approach with a FP-specific marker will give the  
347 opportunity to further characterize the behavior of intermediate target cells with regard  
348 to axon guidance at choice points.

349 Ultimately, our method will be useful to get more insights into molecular mechanisms of  
350 axon guidance at a choice point, when combined with *in ovo* RNAi for specific gene  
351 knockdowns either in the neurons or in their environment, as exemplified with Fzd3  
352 knockdown experiments (Figure 7) (Andermatt et al., 2014; Pekarik et al., 2003).  
353 Similarly, pharmacological blockers will permit to screen for components required  
354 downstream of growth cone receptors to transduce guidance signals. Usually such  
355 experiments are conducted *in vitro* with cultured neurons growing axons in a very  
356 artificial environment. Thus, our method offers the advantages of an *in vitro* experiment  
357 in an intact complex '*in vivo*-like' environment. The use of specific reporters will also  
358 allow for the assessment of dynamic changes of second messengers or the actin  
359 cytoskeleton in growth cones for example (Nicol et al., 2011; Nichols and Smith, 2019).  
360 Moreover, the use of other sets of enhancers and promoters might offer the possibility  
361 to study the dynamics of midline crossing in other subtypes of commissural neurons in  
362 the spinal cord and in the brain (Hadas et al., 2014; Kohl et al., 2012).

363

## 364 **MATERIALS AND METHODS**

### 365 ***In ovo* electroporation**

366 Plasmids encoding farnesylated td-Tomato under control of the Math1 enhancer and the  
367  $\beta$ -globin promoter for dl1 neuron-specific expression (Math1::tdTomato-F, 700 ng/ $\mu$ l)  
368 and farnesylated EGFP under control of the  $\beta$ -actin promoter ( $\beta$ -actin::EGFP-F, 30  
369 ng/ $\mu$ l) were co-injected into the central canal of the chicken neural tube *in ovo* at HH17-  
370 18 (Hamburger and Hamilton, 1951) and unilaterally electroporated, using a BTX  
371 ECM830 square-wave electroporator (five pulses at 25 V with 50 ms duration each), as  
372 previously described (Wilson and Stoeckli, 2012) (Fig. 1A,B). A final concentration of  
373 0.1% (vol/vol) of Fast Green was added to the plasmid mix to trace injection site and  
374 volume of the plasmid mix. After electroporation, embryos were covered with sterile  
375 PBS and eggs were sealed with tape and incubated at 39°C for 26-30 hours, until  
376 embryos reached stage HH22, or for 36-46 hours, until embryos reached HH24. For the  
377 FP study EGFP-F was expressed from a plasmid with the Hoxa1 enhancer and the  $\beta$ -  
378 globin minimal promoter (Wilson and Stoeckli, 2011) (Hoxa1::EGFP-F, 1000 ng/ $\mu$ l) and

379 co-injected with the Math1::tdTomato-F plasmid (700 ng/ $\mu$ l) and unilaterally  
380 electroporated as above, or bilaterally electroporated (3 pulses in each direction at 25 V  
381 with 50 ms duration each). For knockdown of Fzd3 (or luciferase as control) in dl1  
382 neurons (Math1 enhancer) plasmids previously published (Math1::EGFP-F; miFzd3 and  
383 Math1::EGFP-F; mi2Luc, 700 ng/ $\mu$ l) were co-injected with the  $\beta$ -actin::mRFP plasmid  
384 (30 ng/ $\mu$ l) and unilaterally electroporated at HH16 for more efficient knockdown (Alther  
385 et al., 2016).

386

### 387 **Dissection of intact spinal cords**

388 Intact spinal cords were dissected from HH22 embryos in ice-cold, sterile PBS (Gibco)  
389 in a silicon-coated Petri dish with sterile instruments. Embryos were pinned down with  
390 their dorsal side down with thin needles (insect pins). Here, special care was taken not  
391 to damage or detach meninges surrounding the spinal cord by avoiding too much  
392 rostro-caudal and lateral tension. Internal organs and ventral vertebrae were removed to  
393 access the spinal cord. Ventral roots were cut off and the spinal cord was carefully  
394 extracted from the embryo with forceps, avoiding any excessive bending. Note that  
395 dorsal root ganglia were not cut off and all were still attached to the spinal cord. The  
396 ventral and dorsal midline were kept intact throughout dissection. Finally, remaining  
397 dorsal tissues were discarded. See Fig. S1 for a detailed step-by-step protocol to  
398 successfully dissect intact HH22 spinal cords. Note that this procedure can also be  
399 applied to older embryos (at least HH24-25). Once intact spinal cords were dissected  
400 and cleaned from any remaining dorsal tissues they were embedded with the ventral  
401 side down in a warm (39°C) 100- $\mu$ l drop of 0.5% low-melting agarose (FMC, Fig. 1D,E,  
402 Fig. S1G) containing a 6:7 ratio of spinal cord medium [MEM with Glutamax (Gibco)  
403 supplemented with 4 mg/ml Albumax (Gibco), 1 mM pyruvate (Sigma), 100 Units/ml  
404 Penicillin and 100  $\mu$ g/ml Streptomycin (Gibco)] in a 35-mm Ibidi  $\mu$ -Dish with glass  
405 bottom (Ibidi, #81158). Note that the spinal cord should be as straight as possible with  
406 the dorso-ventral axis perpendicular to the glass bottom, as any pronounced curvature  
407 or tilting of the midline would induce axon guidance artefacts or death of the axons,  
408 respectively. Once the agarose solidified (around 5 min at room temperature), 200  $\mu$ l of

409 spinal cord medium were added to the drop and the culture could be started. A 12-mm  
410 flexiPERM conA ring (Sarstedt) was placed in the center of the culture dish before the  
411 agarose drop was added (the drop should not touch the ring). Hence, the medium  
412 added to the drop of low-melting agarose could touch the ring all around and therefore  
413 stabilize the position of the agarose drop and avoid any movement of the spinal cord  
414 during recordings thanks to surface tension (Fig. S1G).

415

### 416 **Dissection of open-books**

417 Open-book preparations of spinal cords were dissected from HH24 embryos as  
418 previously described in a video protocol for HH25-26 embryos (Wilson and Stoeckli,  
419 2012). The first steps were identical to the protocol for intact spinal cord dissection  
420 given above (steps A,B in Fig. S1). Starting there, the tension along the rostro-caudal  
421 axis was increased using the upper and lower needles and meninges were removed  
422 with a blade made of fire-polished tungsten wire. Spinal cords were cut transversally at  
423 the wing and leg levels and carefully extracted from the embryo with forceps. At this  
424 point, the dorsal midline spontaneously opened. Open-book preparations of spinal cords  
425 were then plated with the apical side down (Fig. 1G,H) in the center of a 35-mm Ibidi  $\mu$ -  
426 Dish with glass bottom (Ibidi, #81158), pre-coated with 20  $\mu$ g/ml poly-L-lysine (Sigma).  
427 A homemade, harp-like holder made out of a Teflon ring and thin nylon strings was  
428 used to keep the spinal cord in place (Fig. 1G). Note that the strings were barely  
429 touching the open-books but stabilized the flat position of the spinal cord. Then, 100  $\mu$ l  
430 of 0.5% low-melting agarose (FMC) containing a 6:7 ratio of spinal cord medium were  
431 added on top of the spinal cord. Once the agarose solidified (around 5 min at room  
432 temperature), 200  $\mu$ l of spinal cord medium were added to the agarose drop and the  
433 culture could be started.

434

### 435 **Live imaging**

436 Live imaging recordings were carried out with an Olympus IX83 inverted microscope  
437 equipped with a spinning disk unit (CSU-X1 10,000 rpm, Yokogawa). Cultured spinal

438 cords were kept at 37°C with 5% CO<sub>2</sub> and 95% air in a PeCon cell vivo chamber  
439 (PeCon). Temperature and CO<sub>2</sub>-levels were controlled by the cell vivo temperature  
440 controller and the CO<sub>2</sub> controller units (PeCon). Spinal cords were incubated for at least  
441 30 min before imaging was started. We acquired 18-40 planes (1.5 μm spacing) of 2x2  
442 binned z-stack images every 15 min for 24 hours with a 20x air objective (UPLSAPO  
443 20x/0.75, Olympus) and an Orca-Flash 4.0 camera (Hamamatsu) with the Olympus  
444 CellSens Dimension 2.2 software. We performed most of our recordings in the lumbar  
445 level of the spinal cord and always took 3 channels of interest: emission at 488 nm and  
446 561 nm, as well as brightfield. Recordings of Fzd3 or luciferase knockdown axons were  
447 performed at the thoracic level. For higher magnification recordings, a 40x silicone oil  
448 objective was used (UPLSAPO S 40x/1.25, Olympus) with same acquisition settings as  
449 above and images taken every 5-15 min.

450

#### 451 **Data processing and virtual tracing**

452 Z-stacks and maximum projections of Z-stack movies were evaluated and processed  
453 using Fiji/ImageJ (Schindelin et al., 2012). The MtrackJ plugin (Meijering et al., 2012)  
454 was used to virtually trace single Math1-positive dl1 commissural axons crossing the  
455 FP. This helped to keep track of which axons had already been quantified. The leading  
456 edge (and not filopodia) of growth cones was always selected for each time point. At the  
457 exit site, as growth cones very often slightly changed their directionality and drastically  
458 change their shape before turning, the central domain of the growth cone was selected  
459 with the tracing tool. Only axons that entered, crossed and exited the FP during the 24-  
460 hour imaging period were traced and quantified. Overlays of labeled axons with EGFP-F  
461 and brightfield channels were used to assess the FP boundaries and midline  
462 localization. The virtual tracing tool was also used to extract the instantaneous growth  
463 speed for each single axon. Note that the montage of dl1 commissural axons shown in  
464 Movie 2 was generated from z-stacks that were 2D deconvolved (nearest neighbor)  
465 using the Olympus CellSens Dimension 2.2 software and assembled with Fiji/ImageJ.  
466 All data acquired with higher magnification (40x silicone oil objective) were 3D  
467 deconvolved using constrained iterative deconvolution of the Olympus CellSens



468 Dimension 2.2 software (5 iterations with adaptive PSF and background removal,  
469 Olympus). Maximum projections of live images containing Hoxa1::EGFP-F-positive cells  
470 (channel) were corrected for photo bleaching in Fiji/ImageJ.

471

## 472 **Temporal-color projections and kymographic analysis**

473 Temporal-color projections were generated using Fiji/ImageJ. Kymograph analysis of  
474 axons crossing or exiting the FP as previously described (Medioni et al., 2015) using a  
475 region of interest (ROI) selection, the re-slice function and the z-projection of the re-  
476 sliced results in Fiji/ImageJ, which allowed following pixel movements within the  
477 horizontal axis. The ROI in the FP was selected as a 103x51  $\mu\text{m}^2$  (Fig. 3C,D) or 103x27  
478  $\mu\text{m}^2$  (Fig. 3E,F) rectangle.

479

## 480 **Immunohistochemistry**

481 Spinal cords dissected from HH22 embryos or intact spinal cords that were cultured for  
482 one day *ex vivo* were fixed one hour at room temperature with 4% paraformaldehyde in  
483 PBS, washed 3 times for 5 min each with PBS and cryopreserved for at least 24h at 4°C  
484 in 25% sucrose in PBS. After mounting in O.C.T. compound (Tissue-Tek) and freezing  
485 the spinal cords, 25- $\mu\text{m}$  thick cryosections were collected using a cryostat. The next  
486 day, sections were blocked and permeabilized 1h at room temperature with 5% FCS in  
487 0.1% Triton X-100 in PBS (blocking buffer). Primary antibodies were diluted in blocking  
488 buffer and added to sections overnight at 4°C (1:400 for goat-anti-GFP-FITC, Rockland;  
489 1:2,500 for rabbit-anti-RFP, antibodies-online; supernatants of monoclonal antibodies  
490 obtained from DSHB: anti-Lhx2 (clone 1C11), anti-islet-1, (clone 40.2D6), anti-Nkx2.2  
491 (clone 74.5A5), anti-Hnf3 $\beta$  (clone 4C7); 3.1  $\mu\text{g}/\text{ml}$  of mouse-anti-Shh, clone 5E1). The  
492 next day, sections were washed 3 times for 15 min each at room temperature with 0.1%  
493 Triton-X100 in PBS. Primary antibodies (except anti-GFP-FITC) were detected with a 2-  
494 hour incubation in adequate secondary antibodies diluted in blocking buffer (1:1,000 for  
495 donkey-anti-mouse-IgG-Cy5 or donkey-anti-rabbit-IgG-Cy3, Jackson  
496 ImmunoResearch). Finally, nuclei were counterstained for 10 min at room temperature

497 with 2.5 µg/ml of Hoechst diluted in 0.1 Triton X-100 in PBS (Invitrogen), washed 3  
498 times for 10 min each with 0.1% Triton X-100 in PBS and 2 times for 5 min each with  
499 PBS before mounting the slides in Mowiol/DABCO. Images were taken with an Olympus  
500 IX83 inverted microscope equipped with a spinning disk unit (CSU-X1 10,000 rpm,  
501 Yokogawa), a 20x air objective (UPLSAPO 20x/0.8, Olympus) or a 40x silicon oil  
502 objective (UPLSAPO S 40x/1.25, Olympus), and an Orca-Flash 4.0 camera  
503 (Hamamatsu) with the Olympus CellSens Dimension 2.2 software, or with an Olympus  
504 BX61 upright microscope and a 10x air objective (UPLFL PH 10x/0.30, Olympus) or 40x  
505 water objective (UAPO W/340 40x/1.15, Olympus) and an Orca-R<sup>2</sup> camera  
506 (Hamamatsu) with the Olympus CellSens Dimension 2.2 software.

507

### 508 **Whole-mount immunostaining**

509 Intact spinal cords dissected from HH24-25 embryos were fixed for 1h at room  
510 temperature in 4% paraformaldehyde in PBS and washed 3 times 10 min each with  
511 PBS. Spinal cords were permeabilized and incubated for 1h at room temperature with  
512 5% FCS in 0.1% Triton X-100 in PBS (blocking buffer). Primary antibodies were diluted  
513 in blocking buffer and added to spinal cords for incubation overnight at 4°C (1:800 of  
514 goat-anti-GFP-FITC, Rockland; 1:5,000 of rabbit-anti-RFP, antibodies-online). The next  
515 day, sections were washed 3 times 30 min each at room temperature with 0.1% Triton-  
516 X100 in PBS. The primary antibody against RFP was detected with a 2-hour incubation  
517 in diluted donkey-anti-rabbit-IgG-Cy3 antibody in blocking buffer (1:1,000, Jackson  
518 ImmunoResearch). Finally, nuclei were counterstained for 30 min at room temperature  
519 with 2.5 µg/ml of Hoechst diluted in 0.1 Triton X-100 in PBS (Invitrogen). Samples were  
520 washed 3 times 30 min each with 0.1% Triton X-100 in PBS and 2 times 15 min each in  
521 PBS. Stained spinal cords were mounted in 100 µl of 0.5% low-melting agarose in  
522 PBS with the ventral midline pointing down on a 35-mm Ibidi µ-Dish with glass bottom  
523 (Ibidi, #81158), similarly as described above. This allowed accessing the commissure of  
524 fixed *in vivo* samples and visualization of dl1 axons and their growth cone with an  
525 Olympus IX83 inverted microscope equipped with a spinning disk unit (CSU-X1 10,000  
526 rpm, Yokogawa). Pictures were taken with a 4x air objective (UPLFLN PH 4x/0.13,

527 Olympus), a 20x air objective (UPLSAPO 20x/0.75, Olympus) ) or a 40x silicon oil  
528 objective (UPLSAPO S 40x/1.25, Olympus) and an Orca-Flash 4.0 camera  
529 (Hamamatsu) with the Olympus CellSens Dimension 2.2 software. Note that the same  
530 mounting and microscopy procedure was applied to HH23-25 intact spinal cords that  
531 were not stained and were used for the quantification of average growth cone areas *in*  
532 *vivo* (shown in Fig. 4C).

533

### 534 **Statistics and Figures assembly**

535 Statistical analyses were carried out with GraphPad Prism 7.02 software. All data were  
536 assessed for normality (normal distribution) using the D'Agostino and Pearson omnibus  
537 K2 normality test and visual assessment of the normal quantile-quantile plot before  
538 choosing an appropriate (parametric or non-parametric) statistical test. P values of the  
539 simple linear regression shown in Fig. 3I,J demonstrate whether the slope is  
540 significantly different to zero and the dashed lines represent the 95% confidence  
541 intervals. Figures were assembled using Corel Draw 2017.

542

### 543 **Acknowledgements**

544 We thank Dr. Beat Kunz for excellent technical assistance.

545

### 546 **Competing interests**

547 The authors declare no competing interests.

548

### 549 **Author contributions**

550 AD, designed experiments, performed experiments, evaluated data and contributed to  
551 the writing of the manuscript, NRZ, generated the Hoxa1 plasmid, ETS, designed  
552 experiments, supervised the project and contributed to the writing of the manuscript.

553 **Funding**

554 This project was supported by the Swiss National Science Foundation.

555

556

557 **References**

558 **Alther, T. A., Domanitskaya, E. and Stoeckli, E. T.** (2016). Calsyntenin 1-mediated  
559 trafficking of axon guidance receptors regulates the switch in axonal  
560 responsiveness at a choice point. *Development*. **143**, 994–1004.

561 **Andermatt, I., Wilson, N. and Stoeckli, E. T.** (2014). In ovo electroporation of miRNA-  
562 based-plasmids to investigate gene function in the developing neural tube. *Methods*  
563 *Mol. Biol.* **1101**, 353–368.

564 **Avilés, E. C., Wilson, N. H. and Stoeckli, E. T.** (2013). Sonic hedgehog and Wnt:  
565 Antagonists in morphogenesis but collaborators in axon guidance. *Front. Cell*  
566 *Neurosci.* **7**, 86. doi:10.3389/fncel.2013.00086

567 **Boubakar, L., Falk, J., Ducuing, H., Thoinet, K., Reynaud, F., Derrington, E. and**  
568 **Castellani, V.** (2017). Molecular Memory of Morphologies by Septins during  
569 Neuron Generation Allows Early Polarity Inheritance. *Neuron* **95**, 834-851.e5.

570 **Bourikas, D., Pekarik, V., Baeriswyl, T., Grunditz, Å., Sadhu, R., Nardó, M. and**  
571 **Stoeckli, E. T.** (2005). Sonic hedgehog guides commissural axons along the  
572 longitudinal axis of the spinal cord. *Nat. Neurosci.* **8**, 297–304.

573 **Bovolenta, P. and Dodd, J.** (1990). Guidance of commissural growth cones at the floor  
574 plate in embryonic rat spinal cord. *Development* **109**, 435–447.

575 **Campbell, R. M. and Peterson, A. C.** (1993). Expression of a lacZ transgene reveals  
576 floor plate cell morphology and macromolecular transfer to commissural axons.  
577 *Development* **119**, 1217–1228.

578 **Das, R. M. and Storey, K. G.** (2014). Apical abscission alters cell polarity and  
579 dismantles the primary cilium during neurogenesis. *Science* **343**, 200–204.

580 **de Ramon Francàs, G., Zuñiga, N. R. and Stoeckli, E. T.** (2017). The spinal cord  
581 shows the way – How axons navigate intermediate targets. *Dev. Biol.* **432**, 43–52.

582 **Domanitskaya, E., Wacker, A., Mauti, O., Baeriswyl, T., Esteve, P., Bovolenta, P.**  
583 **and Stoeckli, E. T.** (2010). Sonic hedgehog guides post-crossing commissural  
584 axons both directly and indirectly by regulating Wnt activity. *J. Neurosci.* **30**,  
585 11167–11176.

586 **Dumoulin, A., Dagane, A., Dittmar, G. and Rathjen, F. G.** (2018). S-palmitoylation Is  
587 Required for the Control of Growth Cone Morphology of DRG Neurons by CNP-  
588 Induced cGMP Signaling. *Front. Mol. Neurosci.* **11**:345 doi:  
589 10.3389/fnmol.2018.00345.

- 590 **González-Méndez, L., Gradilla, A. C. and Guerrero, I.** (2019). The cytoneme  
591 connection: Direct long-distance signal transfer during development. *Development*.  
592 **146**: dev174607.
- 593 **Hadas, Y., Etlin, A., Falk, H., Avraham, O., Kobilier, O., Panet, A., Lev-Tov, A. and**  
594 **Klar, A.** (2014). A “tool box” for deciphering neuronal circuits in the developing  
595 chick spinal cord. *Nucleic Acids Res.* **42**, e148. doi:10.1093/nar/gku750.
- 596 **Hamburger, V., and Hamilton, H.L.** (1951). A series of normal stages in the  
597 development of the chick embryo. *J. Morphol.* **88**, 49–92. **Kohl, A., Hadas, Y.,**  
598 **Klar, A. and Sela-Donenfeld, D.** (2012). Axonal patterns and targets of dA1  
599 interneurons in the chick hindbrain. *J. Neurosci.* **32**, 5757–5771.
- 600 **Li, X. and Lufkin, T.** (2000). Cre recombinase expression in the floorplate, notochord  
601 and gut epithelium in transgenic embryos driven by the Hoxa-1 enhancer III.  
602 *Genesis* **26**, 121–122.
- 603 **Li, Y., Vieceli, F. M., Gonzalez, W. G., Li, A., Tang, W., Lois, C. and Bronner, M. E.**  
604 (2019). In Vivo Quantitative Imaging Provides Insights into Trunk Neural Crest  
605 Migration. *Cell Rep.* **26**, 1489-1500.e3.
- 606 **Liu, T. L., Upadhyayula, S., Milkie, D. E., Singh, V., Wang, K., Swinburne, I. A.,**  
607 **Mosaliganti, K. R., Collins, Z. M., Hiscock, T. W., Shea, J., et al.** (2018).  
608 Observing the cell in its native state: Imaging subcellular dynamics in multicellular  
609 organisms. *Science* **360**, eaaq1392.
- 610 **Long, H., Sabatier, C., Ma, L., Plump, A., Yuan, W., Ornitz, D. M., Tamada, A.,**  
611 **Murakami, F., Goodman, C. S. and Tessier-Lavigne, M.** (2004). Conserved roles  
612 for Slit and Robo proteins in midline commissural axon guidance. *Neuron* **42**, 213–  
613 223.
- 614 **Lyuksytova, A. I., Lu, C. C., Milanesio, N., King, L. A., Guo, N., Wang, Y., Nathans,**  
615 **J., Tessier-Lavigne, M. and Zou, Y.** (2003). Anterior-Posterior Guidance of  
616 Commissural Axons by Wnt-Frizzled Signaling. *Science* **302**, 1984–1988.
- 617 **McConnell, R. E., van Veen, J. E., Vidaki, M., Kwiatkowski, A. V., Meyer, A. S. and**  
618 **Gertler, F. B.** (2016). A requirement for filopodia extension toward Slit during  
619 Robo-mediated axon repulsion. *J. Cell Biol.* **213**, 261–274.
- 620 **Medioni, C., Ephrussi, A. and Besse, F.** (2015). Live imaging of axonal transport in  
621 *Drosophila* pupal brain explants. *Nat. Protoc.* **10**, 574–584.
- 622 **Meijering, E., Dzyubachyk, O. and Smal, I.** (2012). Methods for cell and particle  
623 tracking. In *Methods in Enzymology*, **504**, pp. 183–200.
- 624 **Nawabi, H., Briançon-Marjollet, A., Clark, C., Sanyas, I., Takamatsu, H., Okuno, T.,**  
625 **Kumanogoh, A., Bozon, M., Takeshima, K., Yoshida, Y., et al.** (2010). A midline  
626 switch of receptor processing regulates commissural axon guidance in vertebrates.  
627 *Genes Dev.* **24**, 396–410.
- 628 **Nichols, E. L. and Smith, C. J.** (2019). Pioneer axons employ Cajal’s battering ram to  
629 enter the spinal cord. *Nat. Commun.* **10**, 562. doi:10.1038/s41467-019-08421-9.

- 630 **Nicol, X., Hong, K. P. and Spitzer, N. C.** (2011). Spatial and temporal second  
631 messenger codes for growth cone turning. *Proc. Natl. Acad. Sci. U. S. A.* **108**,  
632 13776–13781.
- 633 **Pekarik, V., Bourikas, D., Miglino, N., Joset, P., Preiswerk, S. and Stoeckli, E. T.**  
634 (2003). Screening for gene function in chicken embryo using RNAi and  
635 electroporation. *Nat. Biotechnol.* **21**, 93–96.
- 636 **Phan, K. D., Hazen, V. M., Frendo, M., Jia, Z. and Butler, S. J.** (2010). The bone  
637 morphogenetic protein roof plate chemorepellent regulates the rate of commissural  
638 axonal growth. *J. Neurosci.* **30**, 15430–15440.
- 639 **Philipp, M., Niederkofler, V., Debrunner, M., Alther, T., Kunz, B. and Stoeckli, E. T.**  
640 (2012). RabGDI controls axonal midline crossing by regulating Robo1 surface  
641 expression. *Neural Dev.* **7**, 36.
- 642 **Pignata, A., Ducuing, H., Boubakar, L., Gardette, T., Kindbeiter, K., Bozon, M.,**  
643 **Tauszig-Delamasure, S., Falk, J., Thoumine, O. and Castellani, V.** (2019). A  
644 Spatiotemporal Sequence of Sensitization to Slits and Semaphorins Orchestrates  
645 Commissural Axon Navigation. *Cell Rep.* **29**, 347-362.e5.
- 646 **Preitner, N., Quan, J., Li, X., Nielsen, F. C. and Flanagan, J. G.** (2016). IMP2 axonal  
647 localization, RNA interactome, and function in the development of axon trajectories.  
648 *Development.* **143**, 2753–2759.
- 649 **Sanders, T. A., Llagostera, E. and Barna, M.** (2013). Specialized filopodia direct long-  
650 range transport of SHH during vertebrate tissue patterning. *Nature* **497**, 628–632.
- 651 **Schindelin, J., Arganda-Carreras, I., Frise, E., Kaynig, V., Longair, M., Pietzsch, T.,**  
652 **Preibisch, S., Rueden, C., Saalfeld, S., Schmid, B., et al.** (2012). Fiji: An open-  
653 source platform for biological-image analysis. *Nat. Methods* **9**, 676–682.
- 654 **Squarzoni, P., Thion, M. S. and Garel, S.** (2015). Neuronal and microglial regulators of  
655 cortical wiring: Usual and novel guideposts. *Front. Neurosci.* **9** :248. doi:  
656 10.3389/fnins.2015.00248.
- 657 **Stanganello, E. and Scholpp, S.** (2016). Role of cytonemes in Wnt transport. *J. Cell*  
658 *Sci.* **129**, 665–672.
- 659 **Stoeckli, E. T.** (2018). Understanding axon guidance: Are we nearly there yet?  
660 *Development.* **145**, dev151415.
- 661 **Vitriol, E. A. and Zheng, J. Q.** (2012). Growth Cone Travel in Space and Time: The  
662 Cellular Ensemble of Cytoskeleton, Adhesion, and Membrane. *Neuron* **73**, 1068–  
663 1081.
- 664 **Wilson, N. H. and Stoeckli, E. T.** (2011). Cell type specific, traceable gene silencing for  
665 functional gene analysis during vertebrate neural development. *Nucleic Acids Res.*  
666 **39**, e133.
- 667 **Wilson, N. H. and Stoeckli, E. T.** (2012). In ovo electroporation of miRNA-based  
668 plasmids in the developing neural tube and assessment of phenotypes by Dil

- 669 injection in open-book preparations. *J. Vis. Exp.* pii: 4384.
- 670 **Wilson, N. H. and Stoeckli, E. T.** (2013). Sonic Hedgehog regulates its own receptor  
671 on postcrossing commissural axons in a glypican1-dependent manner. *Neuron* **79**,  
672 478–491.
- 673 **Yaginuma, H., Homma, S., Künzi, R. and Oppenheim, R. W.** (1991). Pathfinding by  
674 growth cones of commissural interneurons in the chick embryo spinal cord: A light  
675 and electron microscopic study. *J. Comp. Neurol.* **304**, 78–102.
- 676 **Yoshioka, T. and Tanaka, O.** (1989). Ultrastructural and cytochemical characterisation  
677 of the floor plate ependyma of the developing rat spinal cord. *J. Anat.* **165**, 87–100.
- 678 **Zisman, S., Marom, K., Avraham, O., Rinsky-Halivni, L., Gai, U., Kligun, G.,**  
679 **Tzarfaty-Majar, V., Suzuki, T. and Klar, A.** (2007). Proteolysis and membrane  
680 capture of F-spondin generates combinatorial guidance cues from a single  
681 molecule. *J. Cell Biol.* **178**, 1237–1249.
- 682 **Zou, Y.** (2012). Does Planar Cell Polarity Signaling Steer Growth Cones? In *Current*  
683 *Topics in Developmental Biology*, pp. 141–160.
- 684
- 685
- 686

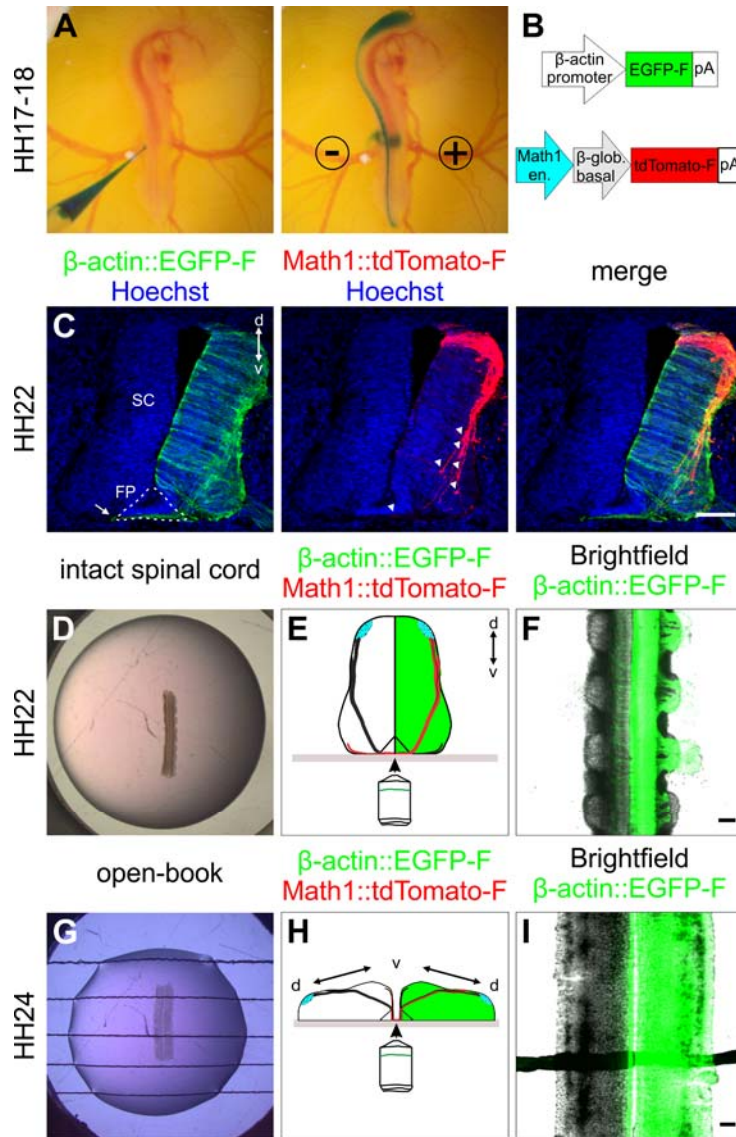

Figure1, Dumoulin et al.

687

688 **Fig. 1. Labeling strategy for dl1 interneurons and spinal cord culture systems. (A-**

689 **C) *In ovo* injection and electroporation of a plasmid mix to specifically label dl1**

690 **interneurons. (A) The plasmid mix was injected into the central canal of the spinal cord**

691 **of HH17-18 chicken embryo *in ovo*, followed by unilateral electroporation. (B) Plasmid**

692 **constructs injected to target all cells ( $\beta$ -actin::EGFP-F) and dl1 interneurons**

693 **(Math1::tdTomato-F). en., enhancer;  $\beta$ -glob.,  $\beta$ -globin. (C) Immunostaining of a**

694 **transverse cryosection of a HH22 spinal cord taken from an embryo sacrificed one day**

695 **after electroporation with the plasmids indicated in (B). At this stage, most dl1 growth**

696 **cones were approaching the FP area, but none of them had crossed it yet (white**



697 arrowheads). However, a substantial number of Math1-negative, but EGFP-F-  
698 expressing commissural axons of more ventral populations had already crossed the FP  
699 at HH22 (arrow). (D-F) Intact spinal cord culture. (D) Intact spinal cords of embryos  
700 injected and electroporated one day earlier were embedded with the ventral side down  
701 in a drop of low-melting agarose. (E) The ventral spinal cord area was imaged with an  
702 inverted spinning disk microscope. The green-colored hemisphere represents the  
703 electroporated side of the spinal cord. (F) Low magnification overview of a spinal cord  
704 visualized with this set-up with cells expressing EGFP-F under the  $\beta$ -actin promoter on  
705 one side merged with the brightfield image. (G-I) Culture of an open-book preparation of  
706 a spinal cord. (G) Intact open-book preparations of HH24 spinal cords dissected from  
707 embryos injected and electroporated about one and a half day earlier were embedded  
708 with the apical side down in an agarose drop with strings to hold it in place. (H) The  
709 midline area was visualized with the same inverted spinning disk microscope as above.  
710 The green-colored hemisphere represents the electroporated side of the spinal cord. (I)  
711 Low magnification overview of a spinal cord visualized with this set-up with cells  
712 expressing EGFP-F under the  $\beta$ -actin promoter on one side merged with the brightfield  
713 image. SC, spinal cord; d, dorsal; v, ventral. Scale bars: 100  $\mu$ m.

714

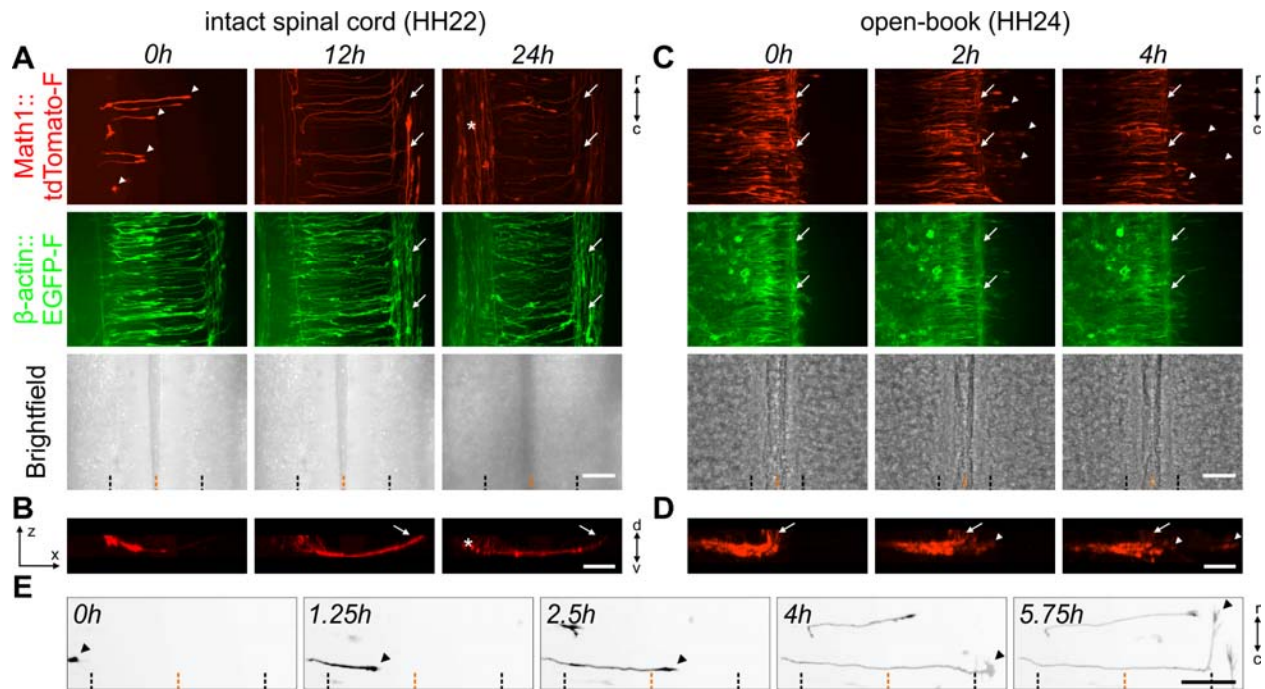

Figure 2, Dumoulin et al.

715

716 **Fig. 2. Live imaging of cultured intact spinal cords allowed for the visualization of**  
 717 **dl1 axons during floor-plate crossing and navigation into the longitudinal axis. (A)**  
 718 24-h time-lapse recording showed that Math1-positive dl1 commissural axons could  
 719 cross the FP (white arrowheads), turn anteriorly, as expected, and form the contralateral  
 720 ventral funiculus (white arrows) in cultured intact HH22 spinal cords. The asterisk  
 721 indicates a population of Math1-positive ipsilateral axons. (B) Transversal view of a  
 722 region of interest from the time-lapse recording shown in (A), highlighting the trajectory  
 723 of dl1 axons and the formation of the commissure. The white arrow indicates the  
 724 position of the contralateral ventral funiculus. The white asterisk labels ipsilateral axons.  
 725 (C) 4-h time-lapse recording showing Math1-positive dl1 commissural axons in a  
 726 cultured open-book preparation of a HH24 spinal cord. Note that within less than 2h in  
 727 culture the majority of dl1 commissural axons were overshooting the contralateral FP  
 728 boundary and growing straight into the contralateral side after having crossed the FP  
 729 (white arrowheads). White arrows indicate the contralateral ventral funiculus. (D)  
 730 Transversal view of a region of interest from the time-lapse sequence shown in (C)  
 731 highlighting the aberrant trajectory of dl1 commissural axons (white arrowheads)  
 732 growing straight past the contralateral ventral funiculus (white arrow). (E) Single dl1

733 growth cones (black arrowheads) could be tracked crossing the FP, exiting it and  
734 turning rostrally. Math1-positive axons are now shown in black. Black and orange  
735 dashed lines indicate FP boundaries and the midline, respectively. d, dorsal; v, ventral;  
736 r, rostral; c, caudal. Scale bars: 50  $\mu$ m.

737

738

739

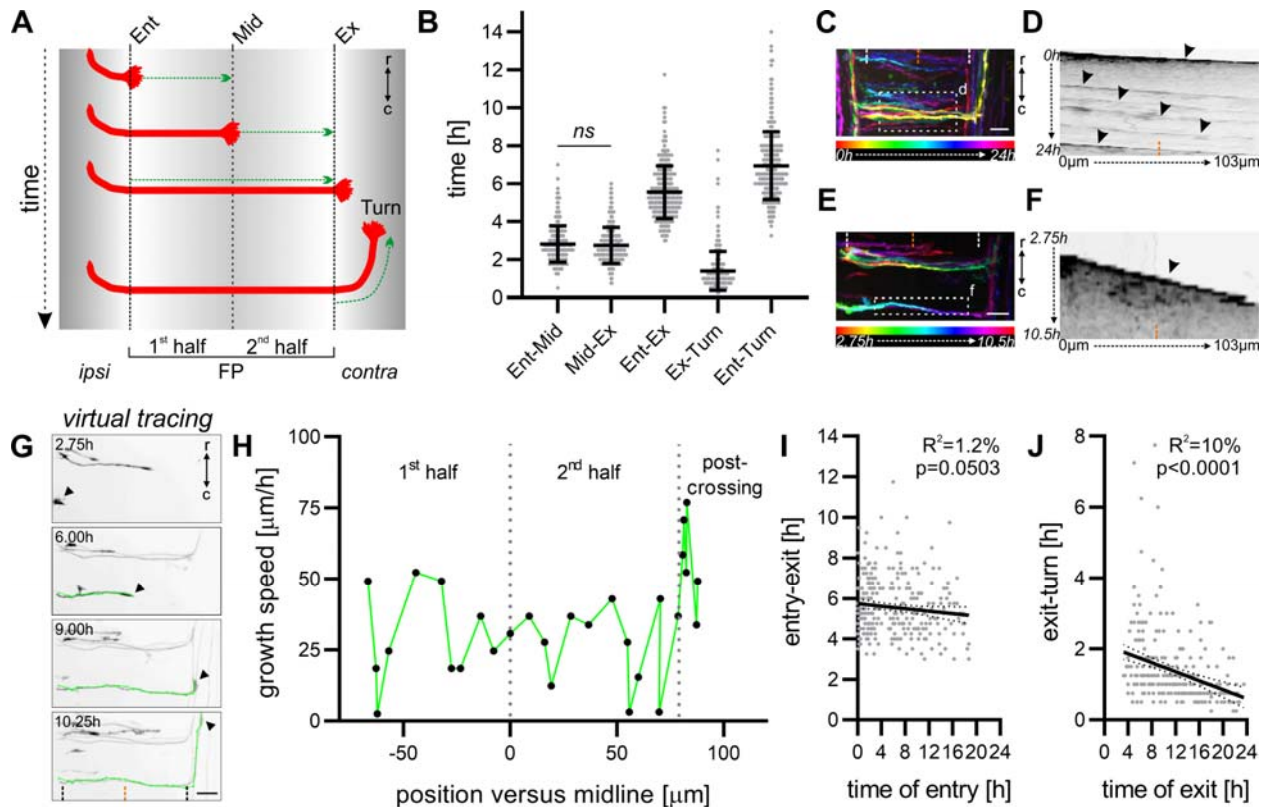

740

Figure 3, Dumoulin et al.

741 **Fig. 3. Characterization of the timing of midline crossing by dl1 commissural**  
 742 **axons.** (A) Schematic depicting how the timing of midline crossing for individual dl1  
 743 axons was measured for each segment of interest. (B) Graph showing the average time  
 744 a growth cone spent in each segment shown in (A) ( $N_{\text{embryos}}=7$ ;  $n_{\text{axons}}=298$ ). There was  
 745 no significant difference in the time taken by dl1 axons to cross the first versus the  
 746 second half of the FP ( $p \geq 0.05$ , paired two-tailed Wilcoxon test). (C) Temporal-color  
 747 code projection of a 24-h time-lapse recording. (D) Kymograph of the 24-h time-lapse  
 748 recording in the region of interest within the FP shown in (C). Several axons crossing  
 749 the FP at different times can be visualized (black arrowheads). (E) Temporal-color  
 750 code projection of 7.75-h time-lapse recording segment. (F) Kymograph of the 7.75-h  
 751 time-lapse recording segment in the region of interest within the FP shown in (E). Within  
 752 this time segment only one axon crossed the FP and could be visualized in the  
 753 kymograph (black arrowhead). White and orange dashed lines represent the FP boundaries  
 754 and the midline, respectively. (G) A virtual tracing tool (shown in green) was used to extract

755 velocity of the growth cones (black arrowheads) at each time point during midline  
756 crossing at the single axon level. The same axon is shown in (E) and (G). Black dashed  
757 lines and the orange dashed lines represent the FP boundaries and midline,  
758 respectively. (H) The growth speed of the axon shown in (G) could be extracted and  
759 plotted against the position of the growth cone in the FP. Dotted grey lines represent the  
760 time at which the axon crossed the midline or exited the FP. (I,J) The time of crossing  
761 the FP (entry-exit) or of turning (exit-turn) for each axons measured in (B) was plotted  
762 against the time of FP entry and exit of the growth cone, respectively. (I) The time axons  
763 took to cross the FP appeared to decrease over time although this was not significant.  
764 (J) The time axons took to turn after exiting the FP decreased significantly over time.  
765 ipsi, ipsilateral; contra, contralateral; Ent, entry; Mid, midline; Ex, exit; r, rostral; c,  
766 caudal. Scale bars: 25  $\mu\text{m}$ .

767

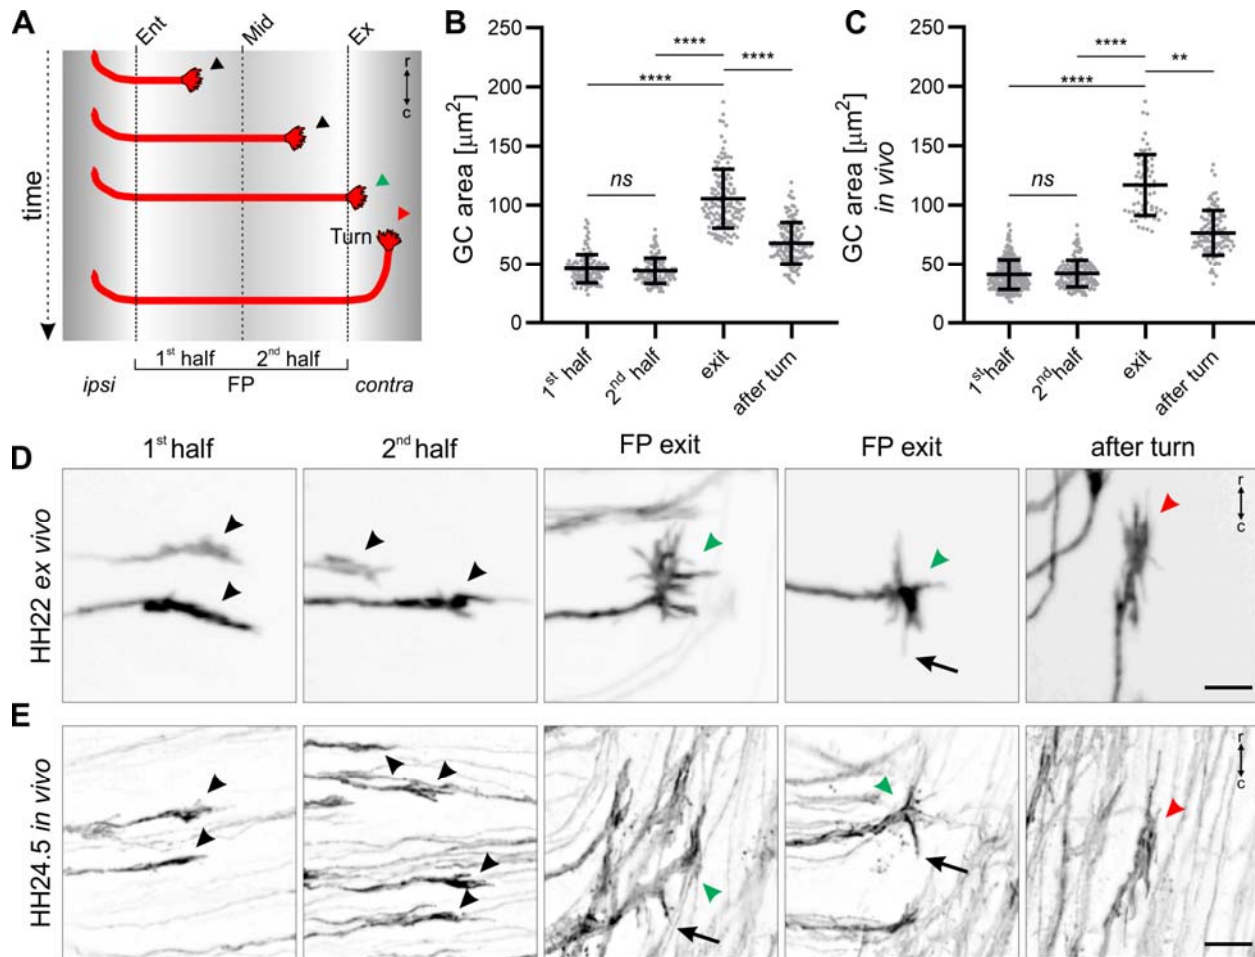

Figure 4, Dumoulin et al.

768

769

770

771

772

773

774

775

776

777

778

779

780

**Fig. 4. Live imaging of intact spinal cords revealed dl1 growth cone morphologies at chosen time points.** (A) Schematic depicting where the growth cone area of individual dl1 axons was measured for (B) and (C). (B) Average growth cone areas were measured from 24-h time-lapse recordings of dl1 axons crossing the midline ( $N_{\text{embryos}}=7$ ;  $n_{\text{growth cones}}=127$ ). No significant difference in the area of growth cones was found between the first and second half of the FP. However, growth cones were significantly larger at the exit site but then again reduced in size after having turned rostrally (paired Friedman test with Dunn's multiple-comparisons test). (C) Average growth cone areas were measured *in vivo* from fixed HH23-25 spinal cords ( $N_{\text{embryos}}=8$ ;  $n_{\text{growth cones}}=285$ (1<sup>st</sup> half), 153 (2<sup>nd</sup> half), 68 (exit) and 102 (after turn)). The relationship between the average growth cone area and the position in the FP corroborated results using the *ex vivo* culture system shown in (B) (unpaired Kruskal-Wallis test with Dunn's

781 multiple-comparisons test). (D,E) Examples corroborating the similarities in growth cone  
782 morphology *ex vivo* and *in vivo* in the FP (black arrowheads), at the exit site (green  
783 arrowheads) and after rostral turn (red arrowheads). At the exit site, growth cones were  
784 spiky with always some filopodia pointing caudally just before rostral turn, a feature that  
785 was also observed *in vivo* (black arrows). ipsi, ipsilateral; contra, contralateral; r, rostral;  
786 c, caudal. Error bars represent standard deviation.  $p < 0.0001$  (\*\*\*\*),  $p < 0.01$  (\*\*) and  
787  $p \geq 0.05$  (ns) for all tests. Scale bars: 10  $\mu\text{m}$ .

788

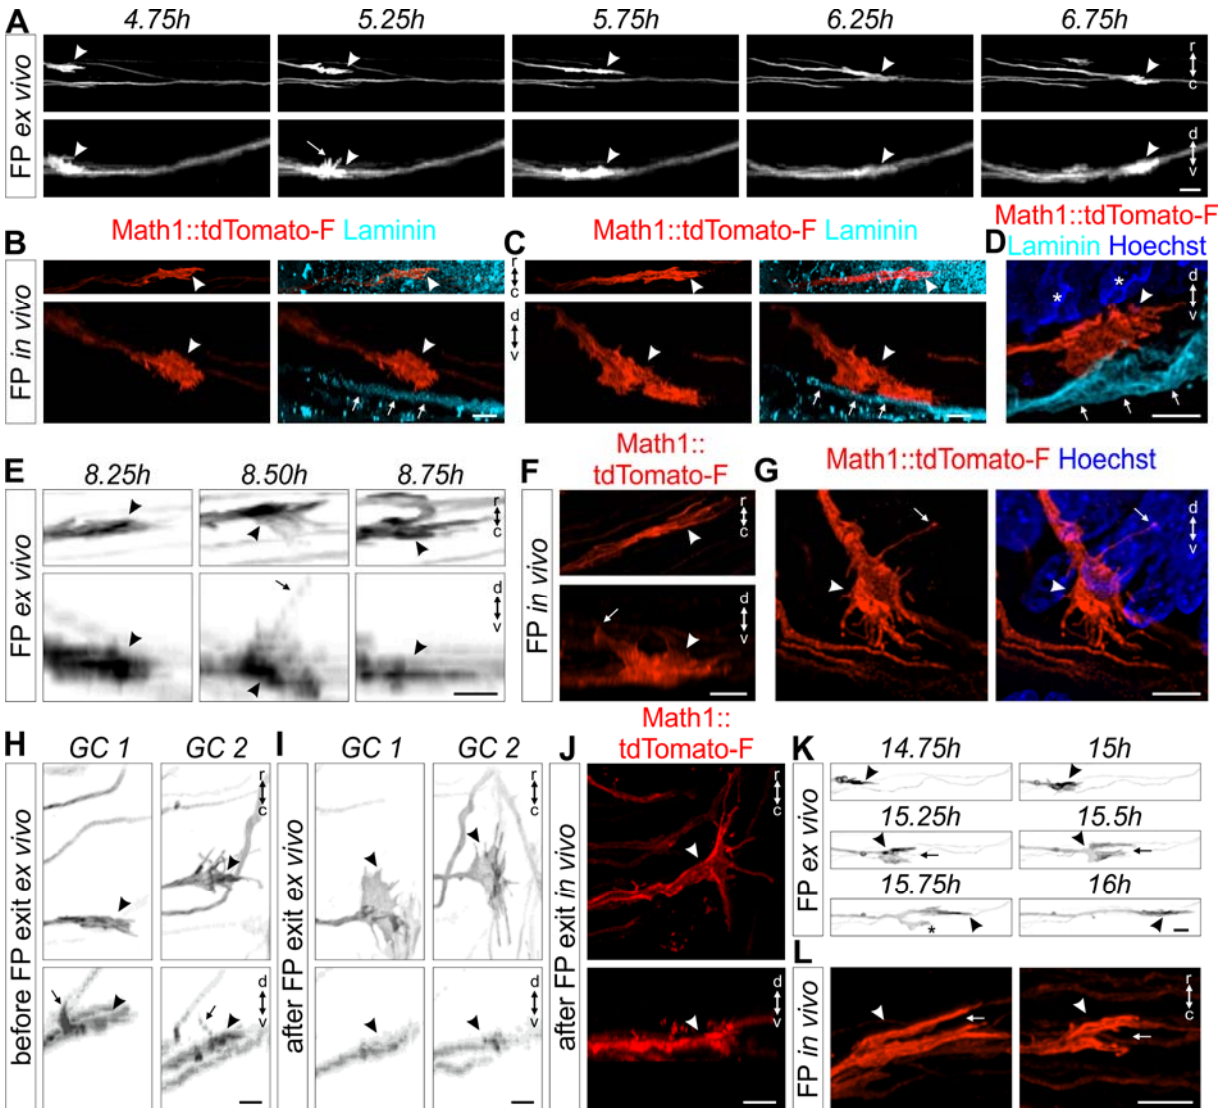

789

Figure 5, Dumoulin et al.

790 **Fig. 5. High magnification live imaging of dl1 commissural axons unraveled their**  
 791 **orientation and activities at choice-points.** (A) A Math1::tdTomato-F-positive growth  
 792 cone (white arrowheads) crossing the FP shown in the rostro-caudal and dorso-ventral  
 793 axis. White arrow shows the dorso-ventral orientation of the growth cone with some  
 794 filopodia extended towards the apical FP. (B,C) Whole-mount immunostaining of  
 795 Math1::tdTomato-F-positive dl1 growth cones in the FP at HH24.5 showed their dorso-  
 796 ventral orientation *in vivo* (white arrowheads). The basal lamina was stained for laminin  
 797 (white arrows). (D) A Math1::tdTomato-F-positive dl1 growth cone in the FP (white  
 798 arrowhead) at HH22 showed its dorso-ventral orientation *in vivo* (white arrowheads).



799 The basal lamina was stained for laminin (white arrows) and nuclei with Hoechst. White  
800 asterisk show nuclei from the FP cells. (E) Three consecutive snapshots from a time-  
801 lapse sequence showing the dorso-ventral activity of a Math1::tdTomato-F-positive  
802 growth cone crossing the FP (black arrowheads) with a long protrusion growing toward  
803 the FP soma level (black arrow). (F,G) A long protrusion growing towards the apical FP  
804 cell soma area (white arrows) could be also observed in dl1 growth cones crossing the  
805 FP *in vivo* (white arrowheads) after whole-mount staining of a HH24 spinal cord (F) or  
806 immunostaining on a HH22 spinal cord transverse section (G). (H) Example of two  
807 growth cones extracted from a time-lapse recording (black arrowheads) showing dorsal  
808 activity with a long protrusion (black arrows) growing towards the FP soma area just  
809 before exiting the FP. (I) The same growth cones shown in (H) after exiting the FP  
810 underwent a 90° change in their orientation. They now were thin in the dorso-ventral  
811 axis and enlarged in the rostro-caudal axis (black arrowheads). (J) HH24.5 whole-mount  
812 immunostaining of Math1::tdTomato-F-positive dl1 growth cone at the FP exit site  
813 showed that the orientation of post-crossing growth cones *in vivo* were the same as  
814 observed by live imaging (white arrowheads). (K) Example of a Math1::tdTomato-F-  
815 positive dl1 growth cone (black arrowhead) transiently splitting (black arrow) while  
816 crossing the FP. One branch always retracted (black asterisk) while the other one  
817 continued to grow straight to the contralateral side. (L) Split growth cones (white arrow)  
818 of Math1::tdTomato-F-positive dl1 axons (white arrowheads) could be observed *in vivo*  
819 after whole-mount staining of HH24.5 spinal cords. GC, growth cone; r, rostral; c,  
820 caudal; d, dorsal; v, ventral. Scale bars: 10 µm (A) and 5 µm (B-L).

821

822

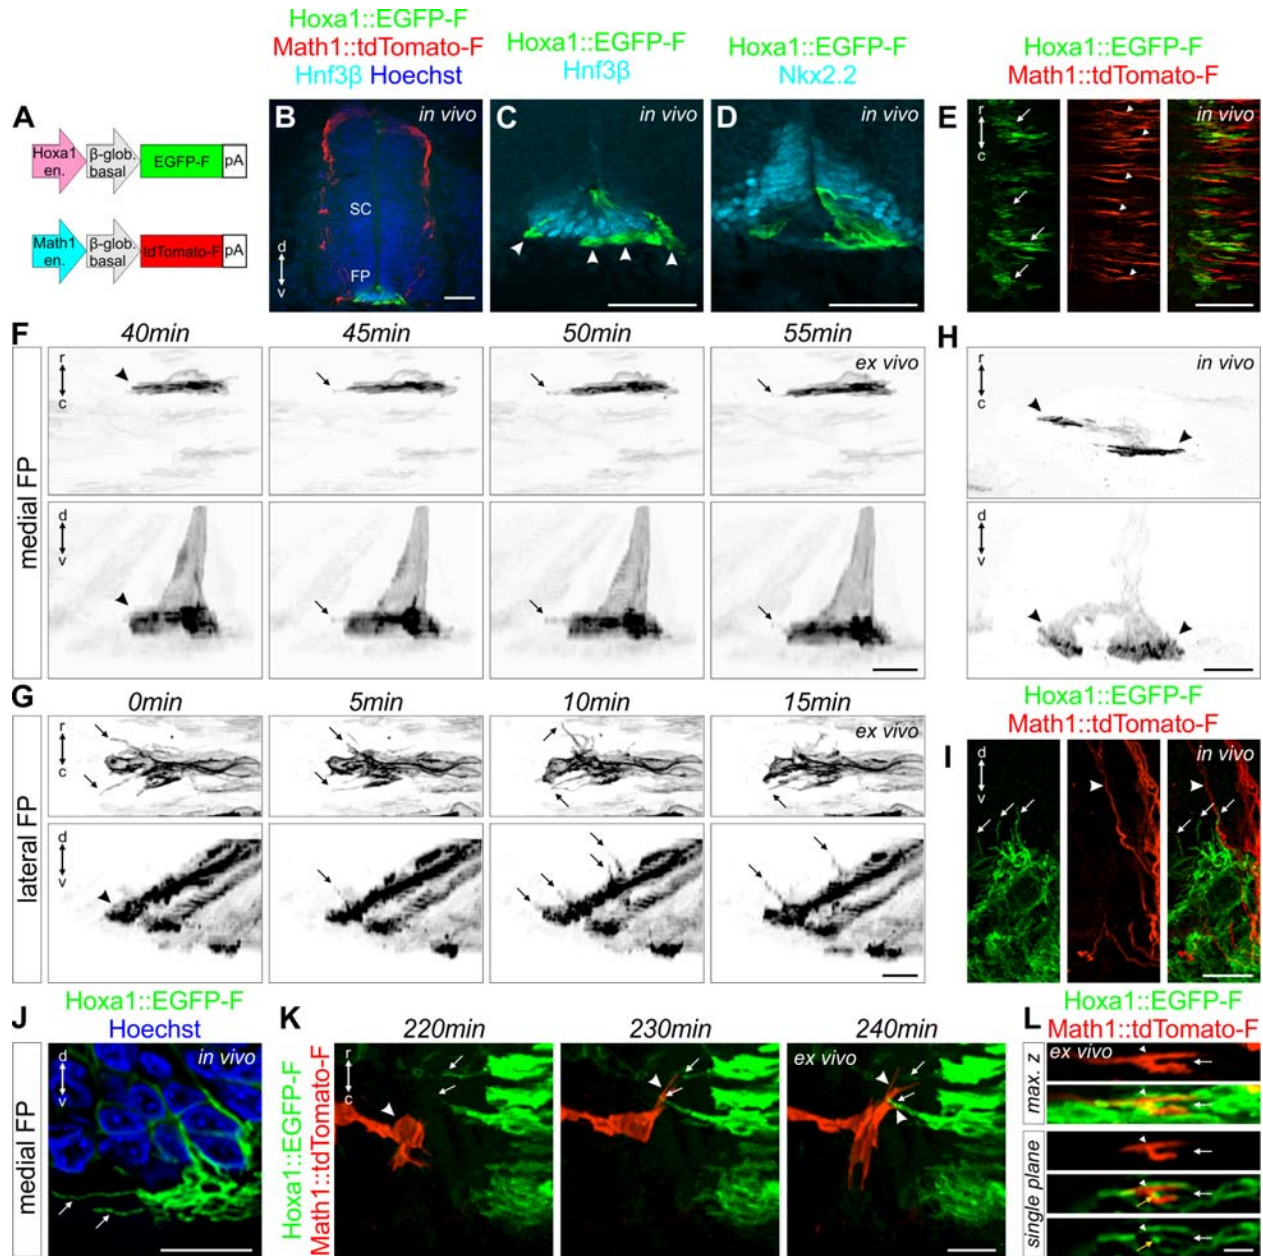

823

Figure 6, Dumoulin et al.

824

**Fig. 6. Live imaging of floor-plate cells during midline crossing shed light on their**

825

**orientation and dynamics.** (A) Schematic depicting plasmids that were electroporated

826

at HH17-18 to visualize FP cells (*Hoxa1* plasmid) together with dl1 axons (*Math1*

827

plasmid). (B) Immunostaining of HH22 spinal cord cryosections revealed the restricted

828

expression of *Hoxa1*::EGFP-F in FP cells co-stained for *Hnf3β*. (C) Higher magnification

829

of the section shown in (B) clearly showing *Hnf3β*-positive FP cells expressing EGFP-F.

830

Bulky FP basal feet could be observed in the commissure (white arrowheads). (D)

831 Immunostaining of HH22 spinal cord cryosections showing that EGFP-F expression  
832 driven by *Hoxa1* enhancer was mostly absent in *Nkx2.2*-positive cells flanking the FP.  
833 (E) Whole-mount immunostaining of *Math1::tdTomato*-F-positive dI1 axons and  
834 *Hoxa1::EGFP-F*-positive FP cells revealed and alignment between dI1 growth cones  
835 (white arrowheads) and basal feet of FP cells (white arrows) in the commissure. (F)  
836 Example of a time-lapse recording of a single medial *Hoxa1::EGFP-F*-positive FP cell to  
837 reveal the geometry of its basal foot that was thin along the rostro-caudal axis but  
838 enlarged in the dorso-ventral axis (black arrowheads). The basal foot was highly  
839 dynamic with protrusions sprouting out in the directions of axonal growth in the  
840 commissure (black arrows). (G) Example of a time-lapse recording of lateral  
841 *Hoxa1::EGFP-F*-positive FP cells showing a very high activity of their basal feet with  
842 highly dynamic protrusions growing towards the arriving pre-crossing axons (black  
843 arrows). (H) Whole-mount immunostaining of a single medial *Hoxa1::EGFP-F*-positive  
844 FP cell *in vivo* at HH24.5 showing similar shape (black arrowheads) as observed by live  
845 imaging. Note that this FP cells contained two feet (black arrowheads). (I)  
846 Immunostaining of a HH22 spinal cord cryosection revealed that lateral *Hoxa1::EGFP-*  
847 *F*-positive FP cells also formed protrusions growing towards the pre-crossing axons *in*  
848 *vivo* (white arrows) where *Math1::tdTomato*-F-positive axons enter the FP (white  
849 arrowheads). (J) Similar protrusions were observed in HH22 medial FP basal feet in the  
850 commissure *in vivo* using immunostaining of cryosections (white arrows). The picture  
851 shows a single plane extracted from a Z-stack. (K) Snapshots extracted from a time-  
852 lapse sequence of a *Math1::tdTomato*-F-positive dI1 growth cone interacting (white  
853 arrowheads) with protrusions from *Hoxa1::EGFP-F*-positive FP basal feet (white arrows)  
854 before entering the FP. (L) Single snapshot from a time-lapse recording sequence  
855 showing maximum Z projection and single plane pictures of a transiently splitting (white  
856 arrow) *Math1::tdTomato*-F-positive dI1 growth cone (white arrowhead) in the FP with  
857 basal feet structures in between the two split branches (yellow arrowhead). SC, spinal  
858 cord; r, rostral; c, caudal; d, dorsal; v, ventral. Scale bars: 50  $\mu\text{m}$  (A), 25  $\mu\text{m}$  (B) and 10  
859  $\mu\text{m}$  (C-L).

860

861

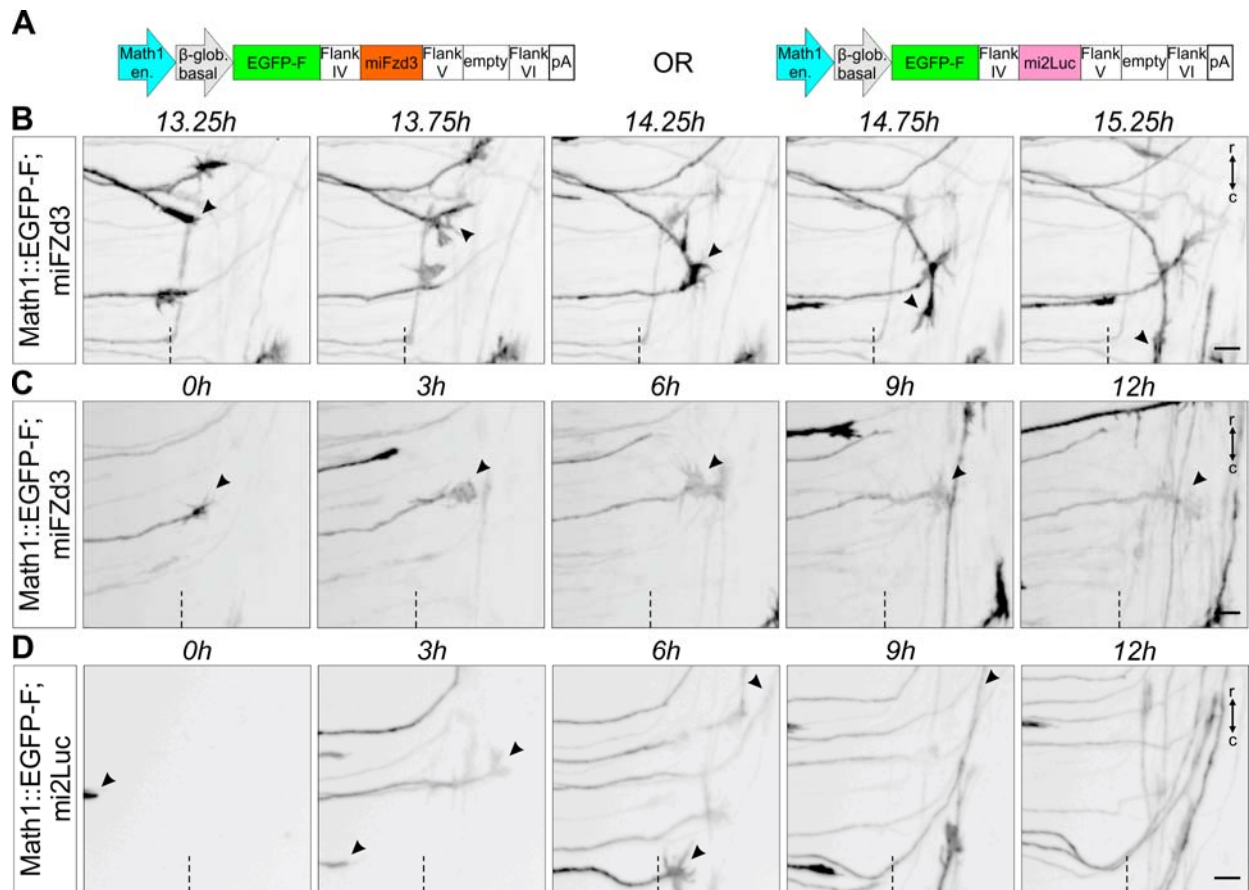

862

Figure 7, Dumoulin et al.

863

**Fig. 7. Live imaging after dl1 neuron-specific knockdown can be used to visualize**

864

**mutant axons in intact spinal cord preparations.** (A) Schematics depicting the

865

plasmid constructs used to knockdown Fzd3 in dl1 neurons. A plasmid expressing a

866

microRNA against Luciferase (mi2Luc) was used as a control. (B) Time-lapse sequence

867

showing a dl1 commissural axon turning caudally instead of rostrally at the FP

868

contralateral border after silencing Fzd3 (black arrowheads). (C) Time-lapse sequence

869

showing a dl1 commissural axon stalling at the contralateral FP border after silencing

870

Fzd3 (black arrowheads). The growth cone kept remodeling but was not able to turn in

871

either direction. (D) Time-lapse sequence showing dl1 axons expressing a microRNA

872

against luciferase. These axons were not impacted and after exiting the FP they all

873

turned rostrally (black arrowheads). Dashed black line represents the FP exit site. r,

874

rostral; c, caudal. Scale bars: 10 μm.

875

876

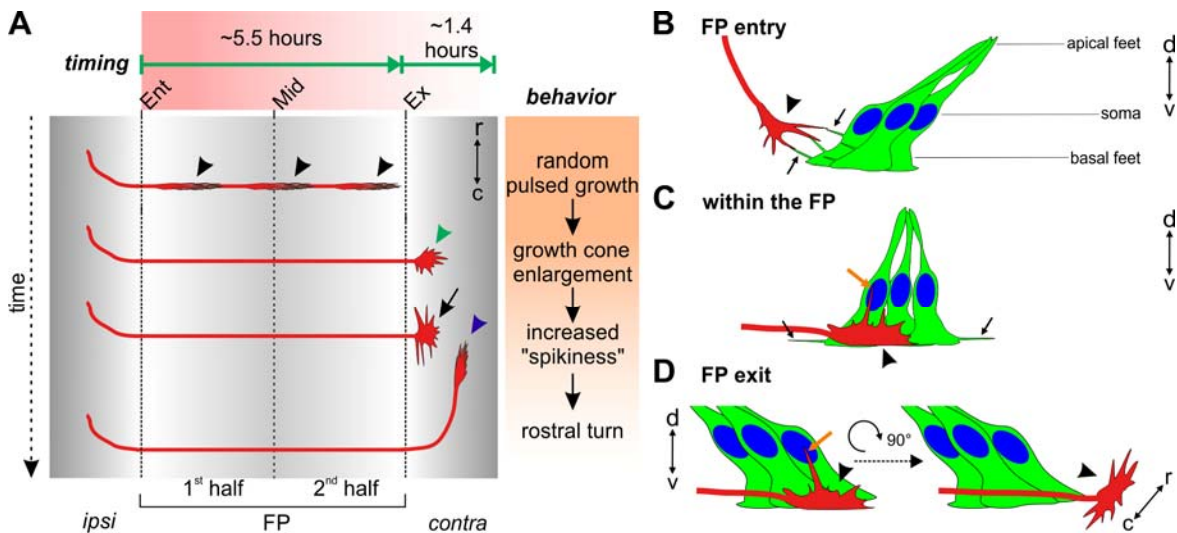

Figure 8, Dumoulin et al.

877

878 **Fig. 8. Cartoon depicting the midline crossing characteristics of dl1 axons based**

879 **on data extracted from our ex vivo culture system.** (A) On average, it took dl1 axons

880 5.6 hours to cross the midline. Growth cones showed a random pulsed growth and had

881 a thin shape in the growth direction (black arrowheads). At the FP exit site, dl1 growth

882 cones were first enlarged (green arrowhead), then extended filopodia along the

883 longitudinal axis (black arrow) right before turning rostrally (blue arrowhead). After

884 arriving at the exit site of the FP, it took dl1 axons on average about 1.4 hours to turn

885 rostrally. In fact, the first exiting dl1 axons took longer to turn rostrally than the late

886 exiting ones. (B-D) Live imaging of intact spinal cords ex ovo using a high magnification

887 objective shed light on dl1 growth cone orientation, FP morphology and dynamics

888 during midline crossing. (B) While dl1 growth cones (black arrowhead) approached the

889 FP, basal feet of lateral FP cells sent protrusions towards them and eventually

890 interacted with them (black arrows). (C) When dl1 growth cones crossed the FP (black

891 arrowhead), their dorso-ventral orientation aligned perfectly with the orientation of basal

892 feet of medial FP cells. While basal feet of FP cells sent protrusions in axonal growth

893 direction (black arrows), dl1 growth cones sent long filopodia in direction of the apical

894 FP, towards the FP cell soma (orange arrow). (D) Just before exiting the FP, dl1 growth

895 cones showed dorso-ventral activity with a long protrusion growing towards the FP

896 soma (orange arrow) area followed by a 90° change in their orientation to become

897 flattened in the dorso-ventral axis and enlarged in the longitudinal axis (black  
898 arrowhead). Ent, entry; Mid, midline; Ex, exit; r, rostral; c, caudal; ipsi, ipsilateral; contra,  
899 contralateral.

900

901  
902 **Movie 1. 24-hour time-lapse recording of the *ex vivo* cultured intact spinal cord**  
903 **shown in Fig. 2A.** Math1::tdTomato-F-positive dl1 axons (red),  $\beta$ -actin::EGFP-F-  
904 positive axons and cells (green) and brightfield maximum projections are shown in  
905 parallel. One z-stack was taken every 15 minutes for each channel. White and orange  
906 dashed lines indicate FP boundaries and the midline, respectively. Rostral is up.

907  
908 **Movie 2. 8-hour segment of a time-lapse recording of an intact spinal cord**  
909 **cultured *ex vivo*.** Math1::tdTomato-F-positive dl1 axons are shown in black. Maximum  
910 projections of z-stacks taken every 15 minutes are represented as well as 3D rotations  
911 at different time points (at FP entry, during FP crossing, at FP exit and after rostral turn).  
912 Black and orange dashed lines indicate FP boundaries and midline, respectively.  
913 Rostral is up.

914  
915 **Movie 3. 4-hour time-lapse recording of the *ex vivo* cultured open-book**  
916 **preparation of the spinal cord shown in Fig. 2C,D.** Math1::tdTomato-F-positive dl1  
917 axons (red),  $\beta$ -actin::EGFP-F-positive axons and cells (green) and brightfield maximum  
918 projections are shown in parallel. One z-stack was taken every 15 minutes for each  
919 channel. White and orange dashed lines indicate FP boundaries and the midline,  
920 respectively. Rostral is up.

921  
922 **Movie 4. 24-hour time-lapse recording of an *ex vivo* cultured intact spinal cord**  
923 **used for kymographic analysis in Fig. 3D.** Math1::tdTomato-F-positive dl1 axons are  
924 shown in black. Maximum projections of z-stacks taken every 15 minutes are  
925 represented. Black and orange dashed lines indicate FP boundaries and midline,  
926 respectively. Rostral is up.

927

928 **Movie 5. 7.75-h time-lapse recording of the segment shown in Fig. 3G.** This movie  
929 shows the virtual tracing of the growth cone (black arrowhead) at each time point  
930 revealing the instantaneous growth speed. Math1::tdTomato-F-positive dl1 axons are  
931 shown in black. Maximum projections of z-stacks taken every 15 minutes are  
932 represented. Black and orange dashed lines indicate FP boundaries and midline,  
933 respectively. Rostral is up.

934

935 **Movie 6. Example of growth cone enlargement at the floor-plate exit site.** Growth  
936 cone of a Math1::tdTomato-F-positive dl1 commissural axon (black arrowheads) exiting  
937 the FP (black dashed line) and becoming spiky with many filopodia before turning  
938 rostrally (black arrow). Rostral is up.

939

940 **Movie 7. Example of growth cone enlargement at the floor-plate exit site.** Two  
941 growth cones of Math1::tdTomato-F-positive dl1 commissural axons (black arrowheads)  
942 exiting the FP (black dashed line) and becoming spiky with filopodia growing in rostral  
943 and caudal direction before turning rostrally (black arrows). Rostral is up.

944

945 **Movie 8. Example of growth cone enlargement and transient splitting at the floor-**  
946 **plate exit site.** Growth cone of a Math1::tdTomato-F-positive dl1 commissural axon  
947 (black arrowheads) exiting the FP (black dashed line), becoming spiky with a lot of  
948 filopodia and transiently splitting before turning rostrally (black arrow). Rostral is up.

949

950 **Movie 9. 24-hour time-lapse recording with high magnification objective of**  
951 **cultured intact spinal cord.** Math1::tdTomato-F-positive dl1 axons are shown in black.  
952 Maximum projections of z-stacks taken every 15 minutes are represented. Dashed lines  
953 represent FP boundaries. Rostral is up.

954



955 **Movie 10. Time-lapse recording within the floor plate uncovered dl1 growth cones**  
956 **orientation.** Math1::tdTomato-F-positive dl1 growth cone (white arrowhead) crossing  
957 the FP showed a dorso-ventral orientation with filopodia activities in the dorso-ventral  
958 axis (white arrows). Maximum projections of z-stacks (rostro-caudal and dorso-ventral  
959 axis) taken every 15 minutes are represented as well as a 3D rotation. r, rostral; c,  
960 caudal; d, dorsal; v, ventral.

961

962 **Movie 11. dl1 growth cones showed the same dorso-ventral orientation in the**  
963 **floor plate *in vivo* (whole-mount staining of HH24.5 intact spinal cord).** 3D  
964 representation of two Math1::tdTomato-F-positive dl1 growth cones (white arrowheads)  
965 showing little extension in the rostro-caudal axis but enlarged size in the dorso-ventral  
966 axis. The basal lamina was stained for laminin (shown in cyan, white arrows). r, rostral;  
967 c, caudal; d, dorsal; v, ventral.

968

969 **Movie 12. Early crossing dl1 growth cones showed the same dorso-ventral**  
970 **orientation in the floor plate *in vivo* as observed *ex vivo* (immunostaining of HH22**  
971 **spinal cord cross-sections).** 3D representation of a Math1::tdTomato-F-positive dl1  
972 growth cones (white arrowheads) showing little extension in the rostro-caudal axis but  
973 enlarged size in the dorso-ventral axis. The basal lamina was stained for laminin (shown  
974 in cyan) and nuclei counter-stained with Hoechst (shown in blue). r, rostral; c, caudal; d,  
975 dorsal; v, ventral.

976

977 **Movie 13. 14-hour time-lapse recording of dl1 axons crossing the floor-plate.**  
978 Rostro-caudal, dorso-ventral and 3D representations of Math1::tdTomato-F-positive dl1  
979 axons crossing the FP. dl1 growth cones transiently split in the FP (black asterisks) and  
980 showed filopodial extensions towards the FP cell soma area (black arrowheads). r,  
981 rostral; c, caudal; d, dorsal; v, ventral.

982

983 **Movie 14. Detailed analysis of dl1 growth cone shape at the floor-plate exit site in**  
984 **real time.** Sequence from a time-lapse recording showing two Math1::tdTomato-F-  
985 positive dl1 commissural growth cones exiting the FP (black arrowheads). Both sent a  
986 protrusion towards the FP cell soma just before exiting (black arrows) and changed their  
987 orientation upon exiting the FP by 90° to adopt an enlarged size in the longitudinal axis.  
988 Dashed line represents the FP exit. r, rostral; c, caudal; d, dorsal; v, ventral.

989

990 **Movie 15. dl1 growth cone at the floor-plate exit site of a HH24.5 spinal cord *in***  
991 ***vivo*.** Example of a Math1::tdTomato-F-positive growth cone (white arrowhead) with  
992 little extension along the dorso-ventral axis but enlarged in the rostro-caudal axis. r,  
993 rostral; c, caudal; d, dorsal; v, ventral.

994

995 **Movie 16. dl1 growth cone transiently split in the floor plate.** Sequence from a time-  
996 lapse recording showing a Math1::tdTomato-F-positive dl1 commissural growth cone  
997 crossing the FP (black arrowhead) and transiently splitting (black arrowhead). Note that  
998 one branch retracted (black asterisk) while the other continued to grow straight towards  
999 the contralateral side (black arrowhead). Rostral is up.

1000

1001 **Movie 17. Time-lapse recording sequence of a Hoxa1::EGFP-F-positive medial**  
1002 **floor plate cell.** Live imaging of a medial FP cell showed that it had a thin basal foot in  
1003 the rostro-caudal axis. In the dorso-ventral axis to foot was large. The FP cell extended  
1004 highly dynamic protrusions from its foot in both directions of axonal growth (black  
1005 arrows). r, rostral; c, caudal; d, dorsal; v, ventral.

1006

1007 **Movie 18. Time-lapse recording sequence of Hoxa1::EGFP-F-positive lateral floor-**  
1008 **plate cells.** Live imaging of lateral FP cells revealed a very high activity of their basal  
1009 feet with highly dynamic protrusions sprouting out in the direction of the arriving pre-  
1010 crossing axons (black arrows). r, rostral; c, caudal; d, dorsal; v, ventral.

1011

1012 **Movie 19. Whole-mount staining of a medial floor-plate cell uncovered its shape**  
1013 ***in vivo***. Example of a single Hoxa1::EGFP-F-positive medial FP cell at HH24.5 (shown  
1014 in green) with two thin basal feet in the rostro-caudal axis that were enlarged in the  
1015 dorso-ventral axis at the level of the commissure (white arrows). The orientation of  
1016 basal feet was aligned to a Math1::tdTomato-F-positive dl1 growth cone (white arrow,  
1017 shown in red). r, rostral; c, caudal; d, dorsal; v, ventral.

1018

1019 **Movie 20. Whole-mount staining of medial floor-plate cells revealed alignment**  
1020 **between their basal feet and dl1 growth cones *in vivo***. Example of Hoxa1::EGFP-F-  
1021 positive medial FP cells at HH24.5 (shown in green) with basal feet oriented in the  
1022 dorso-ventral axis (white arrows). Math1::tdTomato-F-positive dl1 growth cones were  
1023 aligned with the FP basal feet (white arrow, shown in red). r, rostral; c, caudal; d, dorsal;  
1024 v, ventral.

1025

1026 **Movie 21. Z-stack animation of the medial floor-plate area reveal protrusions of**  
1027 **basal feet and demonstrated close interaction between dl1 axons and floor-plate**  
1028 **basal feet in the commissure *in vivo***. Immunohistochemistry of HH22 spinal cord  
1029 sections revealed that Hoxa1::EGFP-F-positive medial FP basal feet (shown in green)  
1030 also contained protrusions in the commissure *in vivo* (white arrows). FP basal feet  
1031 seemed to enwrap Math1::tdTomato-F-positive axons in the commissure (white  
1032 arrowheads). Nuclei were counterstained with Hoechst (shown in blue). d, dorsal; v,  
1033 ventral.

1034

1035 **Movie 22. Time-lapse recording sequence of a dl1 commissural growth cone**  
1036 **interacting with protrusions from floor-plate basal feet before entering the floor**  
1037 **plate**. A Math1::tdTomato-F-positive dl1 growth cone (shown in red) extended filopodia  
1038 in the direction of the FP (white arrowheads) and eventually interacted with protrusions

1039 (white arrows) coming from the *Hoxa1::EGFP-F*-positive FP basal feet (shown in green)  
1040 before entering the FP. Note that at “t=240 min” a Z-stack animation is shown to  
1041 pinpoint the close vicinity between basal feet protrusions and the growth cone (white  
1042 arrows and arrowheads, respectively). Rostral is up.

1043  
1044 **Movie 23. Time-lapse recording sequence of a *dl1* commissural growth cone**  
1045 **transiently splitting in the commissure in between floor-plate basal feet.** A  
1046 *Math1::tdTomato-F*-positive *dl1* growth cone (shown in red, white arrowhead) growing  
1047 through the FP basal feet (shown in green) and undergoing transient splitting (white  
1048 arrow). Note that at “t=2 h” (splitting time point) a Z-stack animation is shown to pinpoint  
1049 that FP basal feet structures (yellow arrow) were present in between both branches of  
1050 the split *dl1* growth cone. Rostral is up.

1051  
1052 **Movie 24. 48-hour time-lapse recording sequence showing aberrant caudal**  
1053 **turning of *dl1* commissural axons after silencing *Fzd3*.** *Math1::EGFP-F*; *miFzd3*-  
1054 positive *dl1* axons exiting the FP are shown in black. The turning behavior at the  
1055 contralateral FP border was randomized with a substantial number of mutant *dl1* axons  
1056 turning caudally instead of rostrally (black arrows). Often, collective behavior was seen,  
1057 that is, after a first axon turning caudally many other growth cones seemed to follow the  
1058 same path and fasciculated with axons that turned in the wrong direction (black  
1059 asterisk). Dashed line represents the FP exit site. Rostral is up.

1060  
1061 **Movie 25. 48-hour time-lapse recording showing growth cone stalling at the floor-**  
1062 **plate exit site after silencing *Fzd3*.** *Math1::EGFP-F*; *miFzd3*-positive *dl1* axons exiting  
1063 the FP are shown in black. Black arrowhead shows a mutant *dl1* axons stalling at the  
1064 contralateral FP border. Some axons were also turning caudally (black arrows). Dashed  
1065 line represents the FP exit site. Rostral is up.

1066

1067 **Movie 26. 48-hour time-lapse recording showing normal behavior of control-**  
1068 **treated dl1 axons at floor-plate exit.** Math1::EGFP-F; mi2Luc-positive dl1 axons  
1069 exiting the FP are shown in black. All growth cones behaved normally at the  
1070 contralateral FP border and turned rostrally (black arrowheads). Dashed line represents  
1071 the FP exit site. Rostral is up.

1072  
1073  
1074

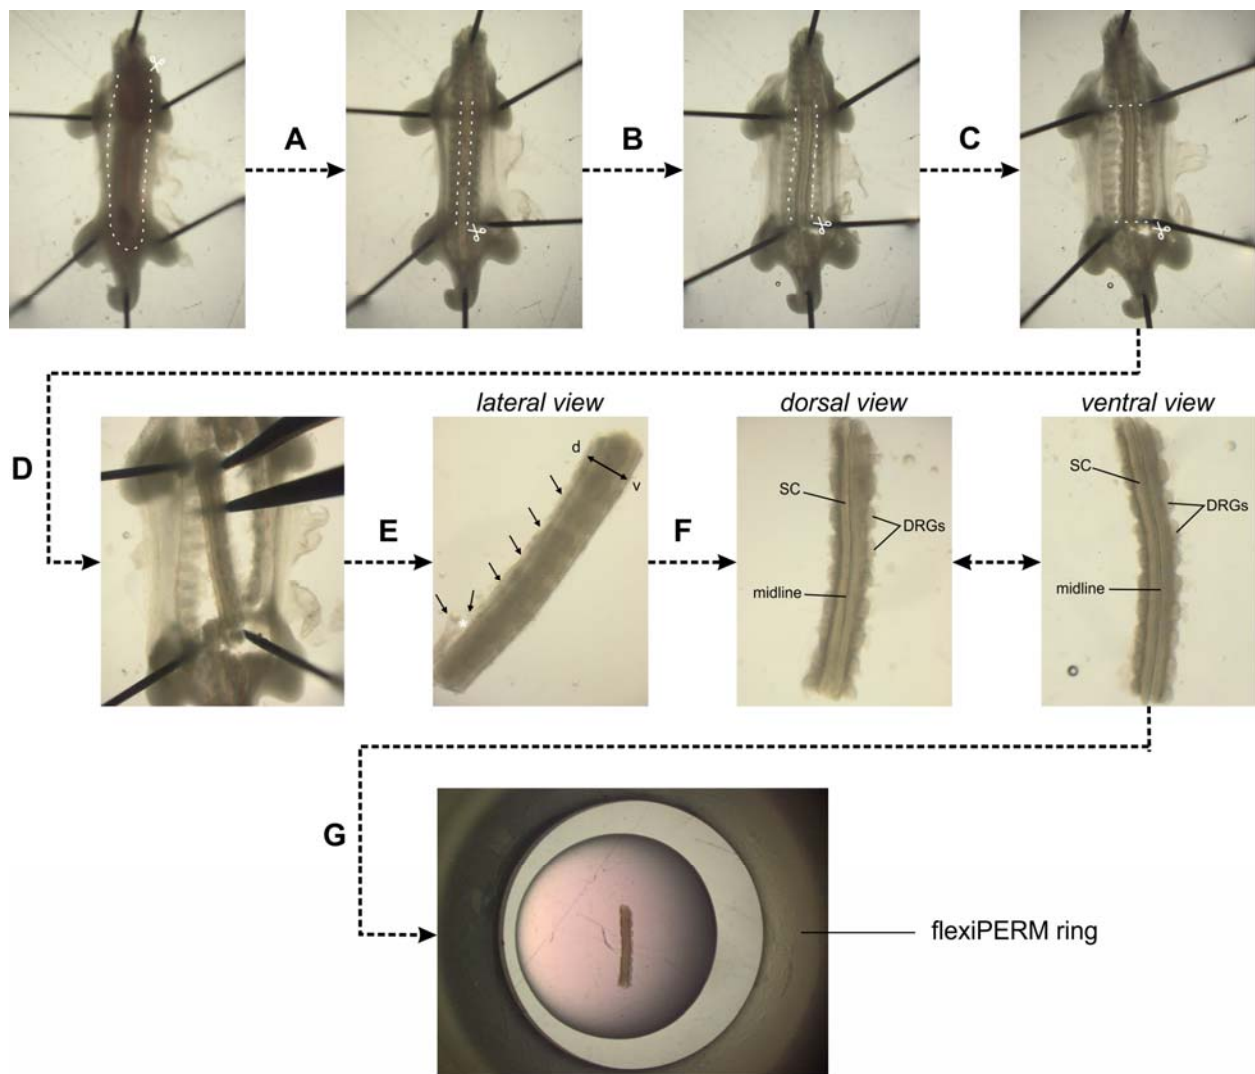

1075 *Figure S1, Dumoulin et al.*  
1076 **Fig. S1. Dissection of intact spinal cords from HH22 chicken embryos.**

1077 (A) HH22 embryos were pinned down with the dorsal side down in a silicon-coated Petri  
1078 dish in sterile, cold PBS. Internal organs were removed by first cutting the ventral skin  
1079 along the dashed lines and pinching out the organs with forceps. (B) Then, a  
1080 laminectomy was performed, i.e. the ventral vertebrae were cut along the caudal-rostral  
1081 axis at the level of the outer spinal cord boundaries and the stripe of bone structure was  
1082 removed with forceps. (C) The visible ventral roots exiting the ventral part of the spinal  
1083 cord and the peripheral processes of the dorsal root ganglia (DRG) were cut in parallel  
1084 to the spinal cord without cutting off any DRG. (D) The spinal cord was then cut at the  
1085 level of the wings and legs. (E) The spinal cord with attached DRG was carefully  
1086 separated from the rest of the embryo with forceps. Here, special care should be given  
1087 not to bend the spinal cord by stabilizing the tissue with a second forceps. (F) At this  
1088 point, the dorsal skin and dermomyotome (black arrows) were removed by first inducing  
1089 an opening with forceps (white asterisk) taking care not to damage the dorsal spinal  
1090 cord. Then, using forceps, the dorsal skin and dermomyotome were carefully removed  
1091 all along the caudal-rostral axis. After this step the dorsal spinal cord should look as  
1092 clean as the ventral spinal cord with clearly visible midline and no remaining tissues  
1093 attached (compare dorsal and ventral view). (G) Finally, the intact spinal cord with  
1094 attached DRG could be embedded as straight as possible in a drop of low-melting  
1095 agarose-medium mix with the ventral side down. White dashed lines indicate where cuts  
1096 with small spring scissors should be made. SC, spinal cord; DRG, dorsal root ganglion.

1097

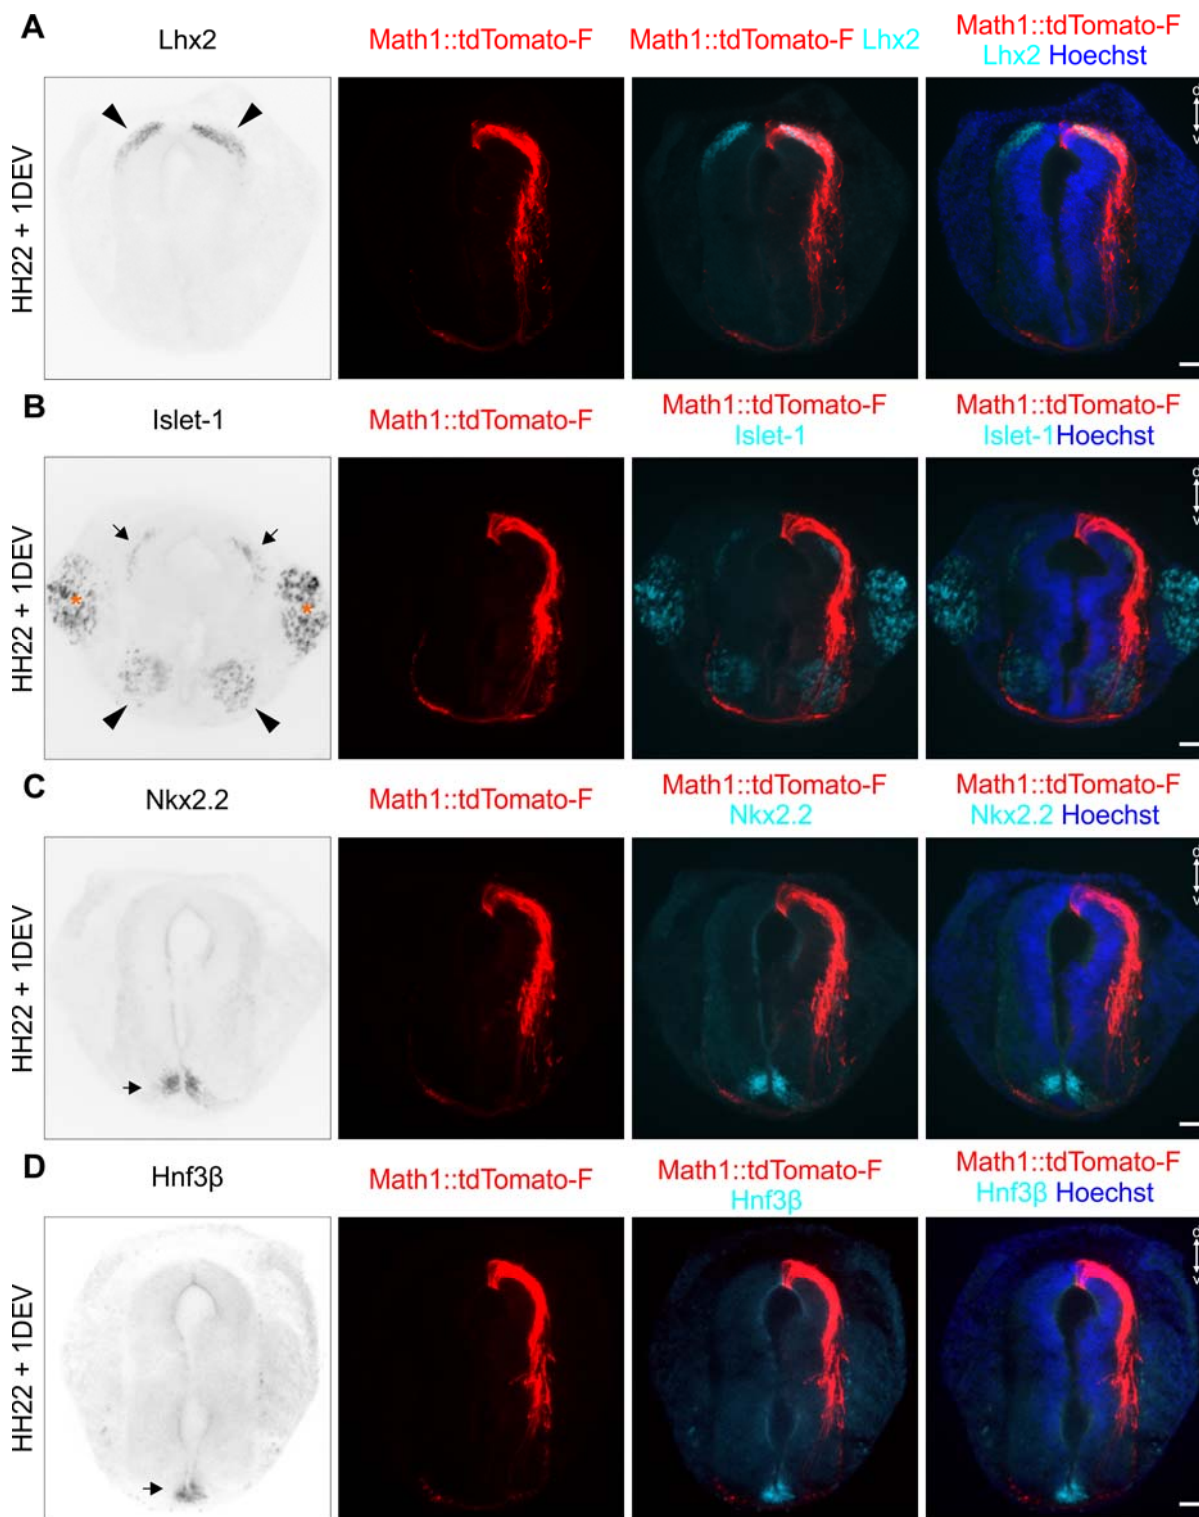

Figure S2, Dumoulin and Stoeckli

1098

1099

1100

1101 **Fig. S2. Patterning of cultured intact spinal cords was conserved after one day ex**  
1102 ***vivo*.**

1103 After intact HH22 spinal cords were cultured and imaged for 1 day *ex vivo*, they were  
1104 fixed and transverse cryosections were immunostained for different dorsal and ventral  
1105 patterning markers, RFP (Math1-positive dl1 neurons) and counterstained with Hoechst.  
1106 (A) The dl1 interneuron marker Lhx2 confirmed that these neurons were still localized in  
1107 the most dorsal part of the spinal cord, as expected (black arrowheads). (B) Islet-1 was  
1108 used as a marker for DRG neurons (orange asterisks), dl3 interneurons (black arrows)  
1109 and motoneurons (black arrowheads). All of them maintained the appropriate position:  
1110 clustered DRG neurons adjacent to the spinal cord; dl3 interneurons localized ventrally  
1111 of dl1 interneurons; motoneurons on both sides of the ventral spinal cord. (C) Nkx2.2  
1112 staining was used to reveal the ventral population of V3 progenitors that are just next to  
1113 the FP and form the typical inverted V-shape (black arrow). (D) Finally, FP cells forming  
1114 the intermediate target for dl1 axons were visualized with Hnf3 $\beta$  staining. They were  
1115 localized at the ventral midline of the spinal cord as expected (black arrow). DEV, day  
1116 *ex vivo*; d, dorsal; v, ventral. Scale bars: 50  $\mu$ m.

1117



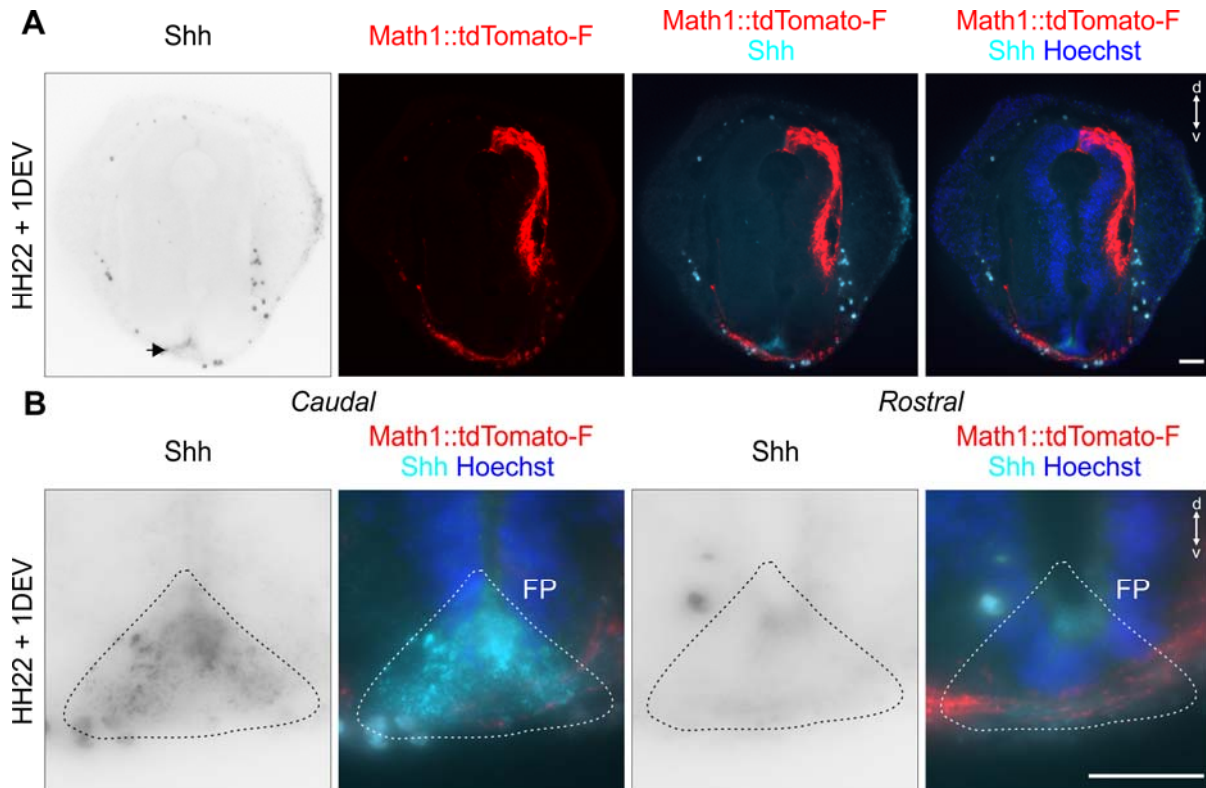

Figure S3, Dumoulin and Stoeckli

1118

1119 **Fig. S3. A Shh gradient is still present in a cultured intact spinal cord after one**  
1120 **day ex vivo.**

1121 Intact HH22 spinal cords were cultured and imaged for 1 day *ex vivo* before fixation.  
1122 Transverse cryosections were immunostained with antibodies against Shh (5E1 clone),  
1123 RFP (Math1-positive dl1 neurons) and counterstained with Hoechst. (A) Shh was still  
1124 expressed in the FP after one day *ex vivo* (black arrow). (B) Moreover, in agreement  
1125 with previous descriptions *in vivo*, Shh was expressed in a decreasing caudal-to-rostral  
1126 gradient. d, dorsal; v, ventral. Scale bars: 50  $\mu$ m.

1127

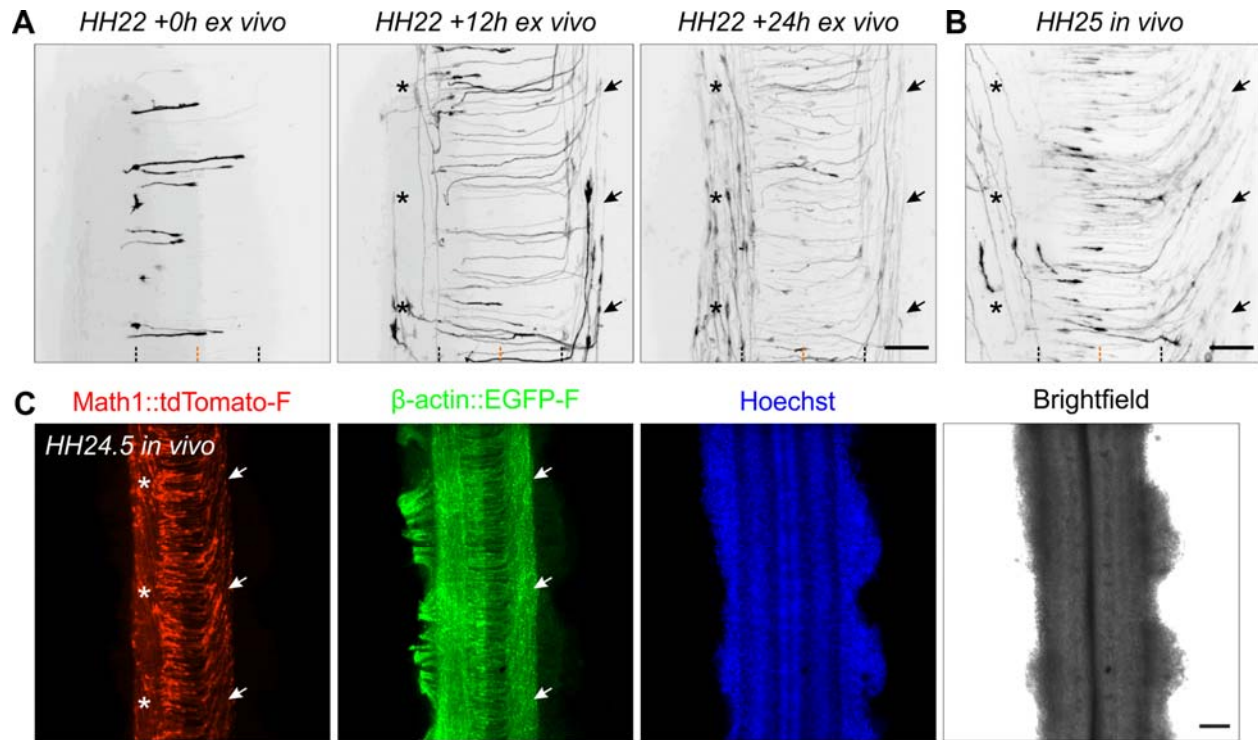

Figure S4, Dumoulin et al.

1128

1129 **Fig. S4. Development of Math1-positive axonal tracts ex vivo and in vivo.**

1130 (A) Sequence of 3 images showing dl1 axons crossing the FP after 0, 12 and 24h of  
1131 culture. After turning rostrally, post-crossing axons started to form the contralateral  
1132 ventral funiculus (black arrows). After around 12h in culture, a Math1-positive ipsilateral  
1133 population could be clearly seen in the ipsilateral ventral funiculus (black asterisks). (B)  
1134 Intact spinal cords dissected at HH25, fixed and mounted similarly to the ex vivo culture  
1135 were imaged the same way. This revealed identical dl1 axonal tracts compared to those  
1136 seen after 24h of culture of intact spinal cords dissected at HH22, with post-crossing  
1137 axons forming the contralateral ventral funiculus (black arrows) and ipsilateral axons  
1138 turning in the ipsilateral ventral funiculus (black asterisks). Black and orange dashed  
1139 lines represent FP boundaries and midline, respectively. (C) Low magnification  
1140 overview of an intact HH24.5 spinal cord, fixed, stained for RFP (Math1-positive  
1141 neurons) and GFP ( $\beta$ -actin transfected cells) and counterstained with Hoechst showing  
1142 the contralateral ventral funiculus containing post-crossing dl1 axons (white arrows) and  
1143 the ipsilateral ventral funiculus containing a population of ipsilateral axons (white  
1144 asterisks). Scale bars: 50  $\mu$ m (A and B) and 100  $\mu$ m (C).

1145

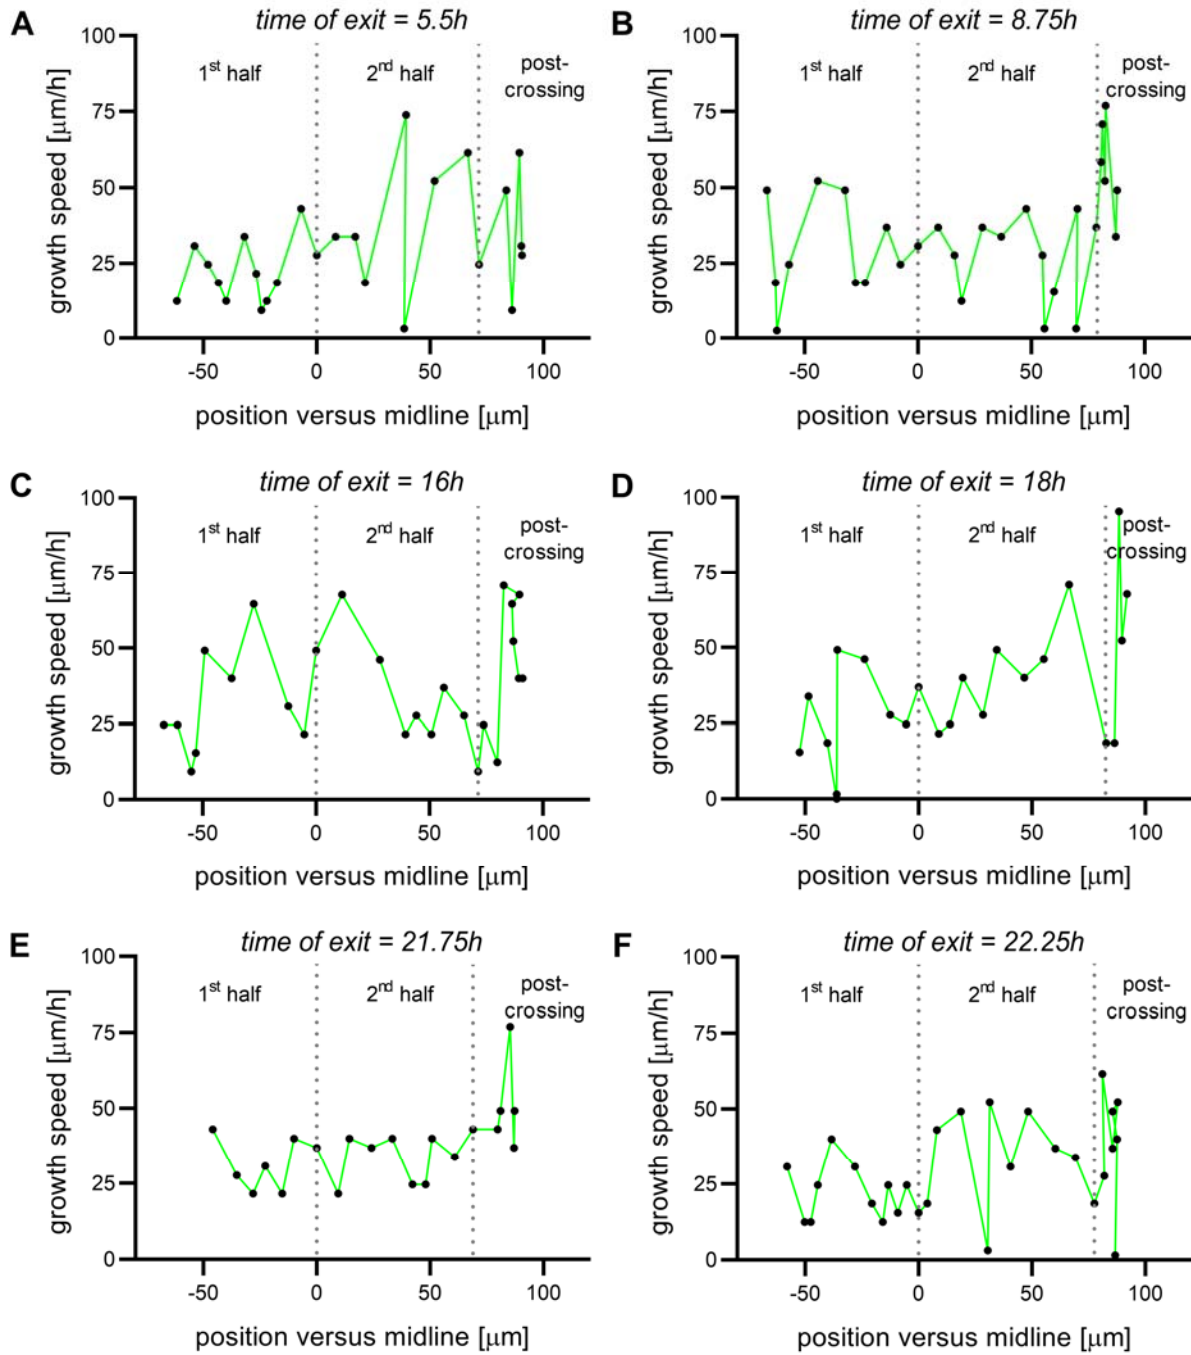

1146

1147

1148

Figure S5, Dumoulin et al.

1149

1150 **Fig. S5. Virtual tracing of axons exiting the FP at different time points.**

1151 Examples of instantaneous growth speed of axons exiting the FP after 5.5h (A), 8.75h  
1152 (B), 16h (C), 18h (D), 21.75h (E) or 22.25h (F) of culture that could be extracted and  
1153 plotted against the position of the growth cone in the FP. Dotted lines represent the time  
1154 at which the axon crossed the midline or exited the FP. All axons were growing with  
1155 pulses of acceleration and deceleration. There was no difference between early or late  
1156 crossing axons.

1157

1158

1159

| Fig.   | Name       | Mean  | Standard deviation |                                   |
|--------|------------|-------|--------------------|-----------------------------------|
| Fig.3B | Ent-Mid    | 2.81  | 0.96               | n(axons)=298 , N(embryos)=7       |
|        | Mid-Ex     | 2.74  | 0.95               | n(axons)=298 , N(embryos)=7       |
|        | Ent-Ex     | 5.55  | 1.39               | n(axons)=298 , N(embryos)=7       |
|        | Ex-Turn    | 1.39  | 1.03               | n(axons)=298 , N(embryos)=7       |
|        | Ent-Turn   | 6.94  | 1.79               | n(axons)=298 , N(embryos)=7       |
| Fig.4B | 1st half   | 46.1  | 12.2               | n(growth cones)=127, N(embryos)=7 |
|        | 2nd half   | 44.2  | 11                 | n(growth cones)=127, N(embryos)=7 |
|        | exit       | 105.5 | 25                 | n(growth cones)=127, N(embryos)=7 |
|        | after turn | 67.8  | 17.6               | n(growth cones)=127, N(embryos)=7 |
| Fig.4C | 1st half   | 41    | 12.6               | n(growth cones)=285, N(embryos)=8 |
|        | 2nd half   | 41.8  | 11.5               | n(growth cones)=153, N(embryos)=8 |
|        | exit       | 116.9 | 25.7               | n(growth cones)=68, N(embryos)=8  |
|        | after turn | 76.5  | 18.9               | n(growth cones)=102, N(embryos)=8 |

1160

1161 **Table S1. Detailed values shown in Figs. 3 and 4.**

1162
